# Quorum sensing integrates environmental cues, cell density and cell history to control bacterial competence

Stefany Moreno-Gómez<sup>1,2</sup>, Robin A. Sorg<sup>1</sup>, Arnau Domenech<sup>1,4</sup>, Morten Kjos<sup>1,3</sup>, Franz J. Weissing<sup>2</sup>, G. Sander van Doorn<sup>2,5</sup> and Jan-Willem Veening<sup>1,4,5</sup>

1. Molecular Genetics Group, Groningen Biomolecular Sciences and Biotechnology Institute, Centre for Synthetic Biology, University of Groningen, Nijenborgh 7, 9747 AG Groningen, the Netherlands

2. Groningen Institute for Evolutionary Life Sciences, University of Groningen, Groningen, P.O. Box 11103, 9700 CC, The Netherlands

3. Present address: Department of Chemistry, Biotechnology and Food Science, Norwegian University of Life Sciences, N-1432 Ås, Norway

4. Present address: Department of Fundamental Microbiology, Faculty of Biology and Medicine, University of Lausanne, Biophore Building, CH-1015 Lausanne, Switzerland

5. Correspondence to G. Sander van Doorn: [g.s.van.doorn@rug.nl](mailto:g.s.van.doorn@rug.nl), tel: +31 (0)50 363 8097 and Jan-Willem Veening: [Jan-Willem.Veening@unil.ch](mailto:Jan-Willem.Veening@unil.ch), tel: +41 (0)21 6925625, Twitter: @JWVeening

Keywords: Quorum sensing, *Streptococcus pneumoniae*, antibiotics, competence, transformation, bacterial stress response, mathematical modeling

## 23    **Abstract**

24    *Streptococcus pneumoniae* becomes competent for genetic transformation when  
 25    exposed to an autoinducer peptide named CSP. This peptide was originally described  
 26    as a quorum-sensing (QS) signal, enabling individual cells to regulate competence in  
 27    response to population density. However, recent studies suggest that CSP may instead  
 28    serve as a probe for sensing environmental cues, such as antibiotic stress or  
 29    environmental diffusion. Here, we show that competence induction can be  
 30    simultaneously influenced by cell density, external pH, antibiotic-induced stress and  
 31    cell history. Our experimental data is explained by a mathematical model where the  
 32    environment and cell history modify how cells produce or sense CSP. Taken together,  
 33    model and experiments indicate that autoinducer concentration can function as an  
 34    indicator of cell density across environmental conditions, while also incorporating  
 35    information on environmental factors or cell history, allowing cells to integrate cues  
 36    such as antibiotic stress into their QS response. This unifying perspective may apply to  
 37    other debated QS systems.

38

## 39    **Introduction**

40    Bacteria release small diffusible molecules in the extracellular medium known as  
 41    autoinducers. These molecules induce the expression of particular functions including  
 42    biofilm formation, luminescence and genetic competence as well as their own  
 43    production <sup>1,2</sup>. The most prevalent functional interpretation of the production and  
 44    response to autoinducers is known as quorum sensing (QS). According to this view,  
 45    the concentration of autoinducer molecules is a proxy for cell density, allowing  
 46    bacteria to regulate the expression of those phenotypes that are only beneficial when

expressed by many cells<sup>1,2</sup>. However, it is likely that the concentration of autoinducer molecules does not only reflect cell density, but that it is also affected by environmental factors, such as the diffusivity of the medium. In fact, alternative hypotheses state that bacteria release autoinducers to sense these environmental factors rather than to monitor cell density. The most well-known hypothesis proposed by Redfield is that the function of autoinducers is diffusion sensing, allowing cells to avoid the secretion of costly molecules under conditions where they would quickly diffuse away<sup>3</sup>. Other potential roles suggested for autoinducer production are sensing local cell density together with diffusion<sup>4</sup>, the positioning of other cells during biofilm formation<sup>5</sup> and temporal variations in pH<sup>6</sup>.

We study pneumococcal competence, a system classically used as an example of QS. However, whether competence is actually controlled by QS has been recently debated. Competence is a transient physiological state that is developed by *Streptococcus pneumoniae*, as well as other bacteria. Upon entry into competence, pneumococci upregulate the expression of genes required for uptake of exogenous DNA as well as bacteriocins and various genes involved in stress response<sup>7</sup>. In *S. pneumoniae*, competence is regulated by an autoinducer molecule known as the competence-stimulating peptide (CSP) in a two-component regulatory system formed by the histidine kinase ComD and the response regulator ComE<sup>8,9</sup> (Figure 1). Despite the detailed understanding of the regulatory network of competence induction, little is known about why competence is controlled by an autoinducer peptide like CSP. CSP has been classically thought to be a QS signal<sup>10</sup>, whose function could be to monitor the density of potential DNA donors<sup>14</sup>. However, competence can be induced in response to environmental factors like pH, oxygen, phosphate and antibiotic stress<sup>11-14</sup>. Based on this evidence and the finding that competence initiates at the same time in

pneumococcal cultures inoculated at different initial densities, it was suggested that CSP acts as a timing device that allows cells to mount a timed response to environmental stress independently of cell density<sup>15,16</sup>. Since then, this hypothesis has established in the field as an alternative to the QS view of competence<sup>13,16–18</sup>. Recently, Prudhomme et al. renamed the timing device mechanism as a growth-time dependent mechanism and proposed that a subpopulation of competent cells that originates stochastically spreads the competent state to the rest of the population by cell-cell contact<sup>19</sup>. Another alternative to QS is that pneumococcal competence is an instance of diffusion sensing. This was suggested by Yang et al. based on the observation that the quorum for competence induction is not fixed but decreases with more restrictive diffusion<sup>20</sup>.

Here, we study the regulation of pneumococcal competence by cell density and two environmental factors, antibiotic stress and pH. Using batch-culture experiments, single cell analyses and mathematical modeling we show that these factors simultaneously regulate competence development because they all affect the CSP concentration: cell density sets the amount of cells producing CSP, whereas the environment and cell history modify the rate at which individual cells produce or sense CSP. Since there is density regulation and we show that CSP is exported extracellularly, we advocate to keep using the term ‘quorum sensing’ in the context of pneumococcal competence but with a broader meaning to acknowledge that in addition to cell density, multiple factors are integrated into this QS response.

93

## 94 **Results**

### 95 **A mathematical model of pneumococcal competence development**

96 We developed a mathematical model of pneumococcal competence based on the  
 97 network of protein interactions known to regulate competence development (Figure 1)  
 98 during growth in a well-mixed liquid medium. Briefly, the precursor of CSP, ComC, is  
 99 cleaved and exported to the extracellular space by the membrane protein complex  
 100 ComAB<sup>9,21</sup>. Upon binding to CSP, ComD phosphorylates the response regulator  
 101 ComE, which in its phosphorylated form upregulates transcription of the operons  
 102 *comAB*, *comCDE* and *comX*<sup>9,22,23</sup>. The latter encodes the sigma factor ComX, which  
 103 controls transcription of genes required for uptake and processing of exogenous DNA  
 104 <sup>7,24</sup>. Our model uses ordinary differential equations (ODEs) and consists of two  
 105 components. At the population-level it keeps track of the population density and the  
 106 extracellular concentration of CSP; at the cell-level it keeps track of the intracellular  
 107 concentrations of the proteins involved in competence regulation (Figure 1). All the  
 108 cells export CSP to the medium at a rate determined by the intracellular concentrations  
 109 of ComC and ComAB. The concentration of CSP then feeds back into the intracellular  
 110 concentrations of all the proteins involved in competence since their transcription rates  
 111 depend on the ratio of ComE to ComE~P and thus on the rate at which ComD  
 112 phosphorylates ComE. Different environmental scenarios are simulated by changing  
 113 model parameters according to the known effects of such environmental factors in the  
 114 competence regulatory network. Since the model is primarily concerned with  
 115 competence initiation we purposely left out genes crucial for other aspects of  
 116 competence development (e.g. the stabilizing factor ComW and the immunity gene  
 117 *comM*)<sup>17</sup> and genes involved in competence shut-off such as DprA<sup>25</sup>. A detailed  
 118 description of the model and the choice of parameter values is provided in  
 119 Supplementary Note 1.

120 We use the model to determine the effect of environmental factors and cell

121 history (i.e. environments experienced in the past) on the relationship between cell  
122 density and CSP concentration. Crucially, the model assumes that all cells are  
123 homogeneous and that competence is only regulated by CSP, whose production  
124 increases with cell density since cells release all CSP they produce to a common  
125 extracellular pool. We are interested in determining whether these assumptions are  
126 sufficient to explain our experimental results in well-mixed cultures or if additional  
127 mechanisms need to be incorporated (e.g. density-independent competence induction  
128 and cell-cell contact dependent competence transmission<sup>15,16,19</sup>).

129

### 130 **Competence develops at a critical CSP concentration**

131 It has been reported that competence develops at a fixed time after inoculation from  
132 acid to alkaline conditions (pH 6.8 → 7.9) regardless of the inoculum size<sup>15,19</sup>. This  
133 observation has motivated the view that competence develops independently of cell  
134 density and rather acts as a timed response at the single cell level to the pH shift  
135 occurring at the moment of inoculation. We extended previous studies by exploring a  
136 wider range of inoculation densities (OD<sub>595nm</sub>: 10<sup>-1</sup> to 10<sup>-7</sup>) (approximately 10<sup>8</sup> to 10<sup>2</sup>  
137 cells ml<sup>-1</sup>) and preculturing conditions. We used the encapsulated serotype 2 strain *S.*  
138 *pneumoniae* D39<sup>26</sup> and cells were washed before inoculation to remove CSP produced  
139 during the preculture. Importantly, we verified that CSP is actually present in the  
140 supernatant of competent cultures of strain D39 (Supplementary Fig. 1). To monitor  
141 competence development, the ComX-dependent promoter of the late competence gene  
142 *ssbB* was fused to the firefly *luc* gene and inserted at the non-essential *bgaA* locus.  
143 Activation and expression of *ssbB* is a good reporter for competence development  
144 since SsbB expression strongly correlates with actual transformation with externally

145 added DNA (e.g. refs. <sup>13,27</sup>).

146 As shown in Figure 2a, we find that the inoculation density in strain D39 does have  
147 an effect on the time of competence development, with competence initiating later for  
148 lower inoculum sizes. For instance, for the lowest inoculation density, competence  
149 initiates more than 4 hours later than for the highest inoculation densities (Figures 2a  
150 and left panel of 2c). Note that our luminometer can detect light from competent cells  
151 at an OD<sub>595</sub> of  $1.56 \times 10^{-3}$  or higher (Supplementary Fig. 2) and therefore we cannot  
152 exclude the possibility that a very small subpopulation of cells initiates competence  
153 before we can detect it. Nevertheless, in all cases our estimates of the density of  
154 competence initiation are far higher than the detection threshold, indicating that  
155 competence in the majority of the population had not developed before crossing the  
156 density threshold (Figure 2c, right panel).

157 Importantly, we observe that the population density at competence initiation is not  
158 constant but positively related to the inoculation density. Hence, the dependency of the  
159 time of competence initiation on the inoculation density is not a consequence of  
160 competence developing at a fixed critical cell density for every condition. Instead, our  
161 results are consistent with the mathematical model, which predicts that competence  
162 develops when the CSP concentration has reached a critical threshold. The model  
163 shows that competence will start faster for higher inoculation densities because the  
164 CSP concentration reaches the critical threshold for competence activation earlier if  
165 more cells are producing CSP (Figure 2d, left panel). Moreover, the model shows that  
166 populations inoculated at low densities initiate competence at a lower density than  
167 populations inoculated at high densities consistent with the experimental data (right  
168 panels of Figures 2c and 2d). This is because cells inoculated at low cell densities  
169 already had time to start transcribing competence regulatory genes and accumulate

170 some CSP once they reached the same cell density of cultures freshly inoculated at a  
171 higher cell density (Figure 2e). Thus, the critical CSP threshold is reached sooner for  
172 low-density inoculated cultures. Notably, a common misconception in the field is that  
173 in a QS system the critical concentration of autoinducer should always be attained at  
174 the same fixed cell density<sup>15,16,19,20</sup>.

175 It is well known that the pH of the medium affects competence development, with  
176 natural competence being inhibited under acid conditions<sup>11,28</sup>. Under our experimental  
177 conditions, competence only naturally develops in alkaline growth medium with a pH  
178 > 7.4. So far, we have studied competence with cells precultured in a non-permissive  
179 pH for competence development (pH 6.8). These preculture conditions were reflected  
180 in the model simulations by assuming that cells initially were in the competence-off  
181 state. We also simulated the alternative scenario that cells are already competent at  
182 inoculation. For this cell history, the model predicts that the time of competence  
183 initiation is lower, but only for high inoculation densities (Figure 2d, left panel). This  
184 happens because when cells are competent initially and are inoculated at high density  
185 they can produce enough CSP to remain competent (Supplementary Fig. 3). However,  
186 when inoculation density is low, cells cannot produce enough CSP and initial  
187 competence switches off. The timing of the subsequent competence initiation is then  
188 the same as if cells were not competent when inoculated.

189 To verify the predicted effect of cell-history on the timing of competence initiation,  
190 we controlled the competence state of cells at inoculation by manipulating the pH  
191 during preculture. Specifically, we compared the time of competence initiation for  
192 cells coming from a non-permissive (pH 6.8) and a permissive (pH 7.9) pH history for  
193 competence development. For inoculation densities below OD<sub>595nm</sub> of 0.01, the pH of  
194 the preculture did not have an effect on the timing of competence initiation as



195 predicted by the model (Figures 2b and c). On the other hand, for inoculation densities  
 196 above OD<sub>595nm</sub> 0.01, there was a time delay in competence initiation for cells with an  
 197 acid history whereas cells with a non-acid history were competent when inoculated and  
 198 remained competent afterwards. This suggests that when the inoculation density is  
 199 high, there are enough cells to take the CSP concentration above the threshold for  
 200 competence activation if they are already producing CSP – as is the case of cells  
 201 coming from a non-acid history. By contrast, if cells come from a non-permissive pH  
 202 for competence development, the machinery for CSP production needs to be activated.  
 203 This causes a delay in competence initiation at high cell densities, which, at least for  
 204 our strain, would not result from regulation by a cell-density independent timing  
 205 device<sup>15,16,19</sup>.

206 To further study competence in conditions closer to what *S. pneumoniae*  
 207 experiences in nature, we monitored competence development at the single-cell level  
 208 in microcolonies growing on a semi-solid surface. To this end, *ssbB* was fused to *gfp*  
 209 and competence initiation was followed using automated fluorescence time-lapse  
 210 microscopy. We observed that competence synchronizes in neighboring microcolonies  
 211 that are not in direct physical contact with each other (Figures 3A, 3B and  
 212 Supplementary Movie 1). In addition, more than 95% of the population became  
 213 competent in sharp contrast with competence development in other species such as  
 214 *Bacillus subtilis* where less than 20% of the population enters the competent state<sup>29,30</sup>.  
 215 Both observations are consistent with the view that CSP diffuses extracellularly and  
 216 drives competence development across the population. We provide experimental  
 217 evidence for this claim by studying mixed populations of our wildtype D39 strain and  
 218 a *comC*<sup>-</sup> mutant, which is unable to produce and export CSP, and therefore only  
 219 develops competence in the presence of external CSP. We followed competence

development in these mixed populations and found that competence can propagate from the wildtype to the *comC*<sup>-</sup> mutant without the need of cell-to-cell contact (Figure 3C and Supplementary Movie 2). Note that the *comC*<sup>-</sup> mutant does not activate competence when grown alone (Supplementary Fig. 4 and Supplementary Movies 3 and 4). This implies that CSP can diffuse extracellularly which confirms our previous finding in liquid culture that CSP can be recovered from the supernatant of a competent culture (Supplementary Fig. 1). It is worth noting that although cells release CSP to an extracellular pool, a fraction might remain attached to them or in close proximity due to diffusivity on the polyacrylamide surface. This can introduce variation in the microenvironment that different cells experience and therefore in the extent of synchronization of competence initiation.

In the experiments discussed so far, we used an encapsulated strain, in contrast to the studies of Claverys *et al.*<sup>15</sup> and Prudhomme *et al.*<sup>19</sup>, which were mainly based on unencapsulated strains. We explored whether this could explain our different observations regarding the effect of inoculation density on competence development by studying additional strains: an unencapsulated version of our strain D39, the clinical isolate PMEN14 together with its unencapsulated version and *S. mitis*, which is naturally unencapsulated. Although we still observe that competence develops later for smaller inoculums, the slope of the RLU signal decreases with inoculation density for the two capsule knockouts and *S. mitis*, in agreement with the results of Claverys *et al.*<sup>15</sup> and Prudhomme *et al.*<sup>19</sup> (Supplementary Fig. 5). A decreasing slope of the RLU signal likely indicates decreased synchronization in competence development at lower inoculation density. Since cells are synchronized by the common extracellular CSP pool, a possible scenario is that the absence of a capsule impedes cells from exporting all the CSP they produce. This would translate into less synchronization especially at

low inoculation densities. In the extreme scenario where cells would not share any CSP with other cells, competence regulation would be in fact independent from cell density. Note, however, that for the capsule knockout of our strain we can still detect CSP in the cell-free supernatant and also observe competence propagation in the absence of cell-cell contact (Supplementary Fig. 6 and Supplementary Movie 5).

250

## 251 **pH and competence development**

In order to understand how environmental factors affect competence, we quantified the effect of external pH on natural competence development. We studied competence at a fine-grained range of pH values from 6.8 to 8.5 and found a clear-cut value that separated permissive from non-permissive external pH values for natural competence development as reported before<sup>11,27</sup>. For our media this was pH 7.4 (Figure 4a). However, not only competence always developed at pH higher than 7.4 but the critical cell density for competence initiation decreased with increasing pH (Figure 4a and b). Therefore, pH does not relate to competence as a binary permissive/non-permissive condition but competence development is more efficient in more alkaline media. The data suggests that for non-permissive pH conditions the cell density at which competence would initiate is above the carrying capacity of the medium, which was also previously proposed by Chen and Morrison<sup>11</sup>.

To study the effect of pH on competence we deleted *comC* from the *comCDE* operon and put it under the control of an IPTG-inducible promoter<sup>31</sup> at an ectopic locus. We then tested competence development in this strain at different pH values (7.2, 7.4, 7.6) and at varying IPTG concentrations. For any given IPTG concentration competence always developed earlier at higher pH. This indicates that cells need to express more *comC* to reach the critical CSP threshold for competence activation the

lower the pH (Supplementary Fig. 8). In fact, at low IPTG concentrations, competence only develops above pH 7.4. The same pattern is observed in an IPTG-inducible *comCDE* strain: for a fixed level of *comCDE* expression, the time of competence initiation still decreases with the pH (Supplementary Fig. 8). Remarkably, in this genetic background competence hardly develops at pH 7.2 even when *comCDE* is fully induced. Cells might need to express more *comC* at lower pH because CSP export and/or detection reduces with decreasing pH. This would also explain why competence barely develops at low pH in the IPTG-inducible *comCDE* strain since for a fixed level of *comE* expression, reduced CSP export and/or detection would bias the ComE~P/ComE ratio towards no competence development. We tested whether pH affects CSP detection by using a *comC*<sup>-</sup> mutant. We performed experiments with medium at different initial pH values where we added various concentrations of synthetic CSP, using the *comC*<sup>-</sup> mutant. We found that competence was mainly dependent on the CSP concentration and only minor differences were found among media with different pH (Supplementary Fig. 8). This suggests that competence development is not mainly mediated by pH-dependent CSP detection so possibly it is mediated by pH-dependent export. As peptidase-containing ATP-binding cassette transporters such as ComAB require ATP to transport substrates<sup>32</sup>, it might be that the proton motive force influences its activity. Therefore, we incorporated the effect of pH in our model by changing the rate at which cells export CSP. In agreement with the experimental results, the modified model confirms that the density of competence initiation decreases with the rate of export of CSP and thus with higher pH. Also, the model predicts that for rates of CSP export below a certain threshold competence does not develop any more since cells never manage to accumulate enough CSP for competence to initiate (Figure 4c). Note however that this is a simplification of the

effect of pH in competence regulation since pH might also affect ComD and/or the stability of CSP (as in other QS systems <sup>6</sup>) and as our data suggest it might also be involved in the shutdown of competence (Supplementary Fig. 8). However, regardless of the exact mechanism, as long as higher pH increases the rate at which single cells produce and/or sense CSP, our model predicts that the density at which the critical CSP concentration for competence activation is attained will decrease with increasing pH (see Section C of the Supplementary Note 1 for a simple mathematical argument).

Finally, we assessed the joint effect of pH and cell density on competence regulation. We did this by studying competence initiation for cultures inoculated at different cell densities in media with different pH both experimentally and using the model. The model predicts that competence will initiate earlier both for higher inoculation densities and more alkaline pH (Figure 5a left panel): While higher inoculation densities mean that more cells will start producing CSP after inoculation, higher pH increases the rate at which individual cells produce CSP. The experimental data is consistent with this prediction (Figure 5b left panel). Therefore, the observation that pH affects competence development is not conflicting with regulation by cell density because the CSP concentration depends on both of these factors.

### **Induction of competence by antibiotics**

The induction of pneumococcal competence is affected by the presence of certain classes of antibiotics <sup>13,27</sup>, which has been considered additional evidence for the hypothesis that competence can be regulated independently of cell density <sup>13,15</sup>. We evaluated this claim by studying the role of HPUra and streptomycin on competence regulation. We chose these antibiotics since the mechanisms by which they induce competence at the molecular level have been elucidated to some extent: HPUra stalls

320 replication forks during DNA replication while initiation of DNA replication  
321 continues, thereby increasing the copy number of genes near the origin of replication  
322 (*oriC*). As a consequence, it up-regulates transcription of *comAB*, *comCDE* and *comX*  
323 as these operons are located proximal to *oriC* <sup>27</sup>. Streptomycin causes mistranslation  
324 and is thought to regulate competence via the membrane protease HtrA which targets  
325 misfolded proteins and also represses competence possibly by degrading CSP <sup>33</sup> (also  
326 see Supplementary Fig. 9). By increasing the amount of misfolded proteins,  
327 streptomycin could reduce the rate at which CSP is degraded by HtrA leading to  
328 competence induction.

329 We reproduced the effect of HPUra and streptomycin on competence regulation in  
330 our model by increasing the transcription rate of *comAB*, *comCDE* and *comX* and by  
331 reducing the rate at which CSP degrades, respectively. Our model predicts that the  
332 presence of antibiotics lowers the pH threshold for competence development (Figure  
333 5a) since antibiotics can counteract the effect of acidic pH to the point that cells can  
334 still accumulate enough CSP to become competent. They do this by increasing the rate  
335 at which single cells produce CSP (reducing the number of cells needed to reach the  
336 critical CSP concentration for competence initiation) or by increasing the rate at which  
337 they sense CSP (reducing the critical CSP concentration for competence initiation).  
338 Also, it predicts that for pH values where competence is already induced without  
339 antibiotics, it will develop faster in the presence of antibiotics (Figure 5a). We tested  
340 these predictions experimentally using antibiotics at concentrations that have a  
341 minimal effect on growth since we did not incorporate growth reduction due to  
342 antibiotic stress in the model. In agreement with previous studies <sup>13,27,33</sup> and with the  
343 model predictions, we find that antibiotics can induce competence at pH values that are  
344 repressive for natural competence development (Figure 5b and c). We also find support

for the second prediction of the model since for permissive pH values for natural competence development (above 7.4), competence is induced earlier in the presence of antibiotics (Figure 5b and d). Remarkably, both the model and the experiments show that the combined effect of pH and cell density in the presence of antibiotics remains the same as when no antibiotics are added (compare left panel with middle and right panels in Figures 5a and 5b): Competence induction still occurs earlier for high densities of inoculation and more alkaline pH values. In the case of HPUra at pH 7.3 it is even possible to see that competence does not develop for the highest inoculation density as the population probably reaches carrying capacity before enough CSP is produced. Finally, note that there might be alternative mechanisms from the ones incorporated in the model by which antibiotic stress affects competence. For instance, antibiotics reduce growth and can induce stress responses that lead to global changes on transcription and translation.

### **Bistable region for competence development and cell history**

An important feature of the competence regulatory network is the presence of a positive feedback that couples CSP detection to CSP production (Figure 1). Signaling systems that contain positive feedback loops often exhibit switch-like responses resulting in the occurrence of alternative stable states<sup>34</sup>. We varied the strength of the positive feedback loop in the model by changing the rate of CSP export and found that the competence regulatory network exhibits bistability for a range of intermediate CSP export rates. In this range, the model predicts the existence of two alternative states where competence switches ‘ON’ or ‘OFF’ depending on the initial conditions (Figure 6a).

369 Since in the model the rate of CSP export is positively correlated to the pH, we  
 370 expected to find a region of pH values exhibiting similar bistability as an additional  
 371 experimental corroboration of the model. Indeed, we found support for the existence of  
 372 a bistable region at pH 7.4 where the wild type developed competence if CSP was  
 373 externally added in concentrations above 4 ng mL<sup>-1</sup> (Figure 6b). Thus, whereas  
 374 competence always switched on for pH values above 7.4 regardless of the initial CSP  
 375 concentration, for pH 7.4 both ‘ON’ and ‘OFF’ states were observed depending on the  
 376 initial CSP concentration. Moreover, at pH 7.4 competence developed with 4 ng mL<sup>-1</sup>  
 377 of CSP a concentration that would not induce competence in the *comC*<sup>-</sup> mutant  
 378 (Supplementary Fig. 8), which indicates that CSP production in the wild type was  
 379 kick-started by the initial addition of CSP resulting in enough overall CSP for  
 380 competence induction.

381 Bistable systems usually exhibit hysteresis. For this reason, we expected that at pH  
 382 7.4 where both the ‘ON’ and ‘OFF’ states are attainable, cell history, would influence  
 383 competence induction. From our previous experiments we determined that cells  
 384 coming from acid preculture inoculated at pH 7.4 do not develop competence at any  
 385 density of inoculation (Figure 5b left panel, second column). We then studied whether  
 386 there is history-dependence by inoculating cells coming from non-acid preculture at  
 387 pH 7.4. We found that cells coming from a non-acid preculture became competent  
 388 when inoculated at densities above OD<sub>595nm</sub> of 2.4x10<sup>-4</sup>, which demonstrates that cell  
 389 history can influence competence development at this pH (Figure 6c). Past history has  
 390 an effect on competence because it determines the state of the machinery for CSP  
 391 production, which is ‘OFF’ when cells come from acid preculture but ‘ON’ when they  
 392 come from non-acid conditions. This explains why the effect of non-acid cell history  
 393 appears from a minimum inoculation density, since enough cells need to be inoculated



in order for them to produce the amount of CSP necessary for the system to remain ‘ON’ (Figure 6a inset). We then hypothesized that at pH 7.3 the critical inoculation density of cells coming from non-acid history would have to be even higher than the one at pH 7.4 as the model predicted that a higher initial concentration of CSP would be necessary for the system to remain ‘ON’ at lower pH. We confirmed this prediction experimentally by showing that at pH 7.3 competence does not develop for an inoculation density of  $OD_{595nm}$   $2.4 \times 10^{-4}$  (as for pH 7.4) but from  $7.4 \times 10^{-4}$  upwards (Supplementary Fig. 10). Thus, our results show that, as a consequence of the positive feedback involved in CSP production, previous exposure to different environmental conditions can determine whether competence is induced or not by modifying the state of the machinery for CSP production and/or sensing.

## Discussion

Recently, the view that bacteria use autoinducers as QS signals has been debated since autoinducer concentration can change in response to the environment. Here, we show experimentally that cell density, pH and antibiotic stress simultaneously regulate competence development in *S. pneumoniae* (Figures 2-5), a system classically framed in the paradigm of QS. Using a mathematical model, we show that this occurs because pH and antibiotics modify the rates at which single cells produce and sense CSP and therefore the strength of the positive feedback loop coupling CSP detection to CSP production (Figures 4 and 5). This environmental dependency does not override regulation by cell density but rather modulates the relationship between the number of cells and the CSP concentration. A fundamental aspect to the dependency on cell density is that cells share CSP with others. Importantly, here we provide evidence both in liquid culture (Supplementary Fig. 1) and through single-cell observations (Figure

3) that CSP is exported to the extracellular space. Finally, we show that competence development is history-dependent since past environmental conditions can modify the status of the machinery to produce and respond to CSP determining whether competence switches on or not (Figure 6). Hysteresis in the competence response might be especially important in the natural niche of the pneumococcus, the human nasopharynx. In particular it is consistent with the observation that there is constitutive upregulation of competence in pneumococcal biofilms during nasopharyngeal colonization<sup>35</sup>. In this context, once competence is triggered for the first time, cells would be primed to rapidly initiate another round of competence.

Why is competence controlled by CSP? CSP does not act as a timing device in our encapsulated strain since competence develops in a cell-density dependent manner without the necessity of cell-cell contact<sup>15,16,19</sup> (Figures 2 and 3). Regarding the hypothesis that CSP is a probe to test diffusion<sup>20</sup>, our results suggest that focusing on diffusion alone oversimplifies the information and functionality that cells can gather through CSP production. We hypothesize that by using an autoinducer peptide, bacteria can coordinate the development of competence and in particular the expression of fratricins and bacteriocins, which are under the control of the competent state. These proteins can lyse or inhibit the growth of surrounding cells that are not competent, increasing the efficiency of genetic transformation and mediating competition with other bacteria<sup>36-39</sup>. By coordinating competence expression via CSP, an isogenic bacterial population can increase the total concentration of secreted fratricins and bacteriocins in times where population density is high, which likely translates into a higher amount of lysed cells and therefore potential DNA donors. Importantly, coordinating competence expression can also prevent the killing of clonal siblings since immunity to these proteins comes with the competent state. Note

443 however that the extent to which cells synchronize competence development may vary  
 444 depending on the strain, genotype and growth conditions. In particular, our results  
 445 suggest that unencapsulated strains may synchronize less, which would explain the  
 446 difference between the findings reported by Prudhomme et al.<sup>19</sup> and our study.  
 447 Decreased synchronization may result from cells exporting less CSP to the  
 448 extracellular space and keeping more to themselves. In fact, in other species like *S.*  
 449 *thermophilus* where competence is controlled by ComS, a peptide that rapidly gets  
 450 imported back into the cell, the rate of competence development decreases with the  
 451 inoculation density<sup>40</sup> as observed for the unencapsulated pneumococcal strains.  
 452 Finally, note that *S. pneumoniae* grows primarily in biofilms where there is  
 453 heterogeneity in the physiological status and microenvironment that different cells  
 454 experience. This can certainly influence the degree of synchronization in competence  
 455 initiation across a population especially in the light of our findings that both current  
 456 and past environmental conditions affect the competence regulatory network. Indeed,  
 457 recent work in *S. mutans* showed heterogeneous competence activation of cells within  
 458 biofilms and upon different environmental pH ranges<sup>41,42</sup>. While studies of well-mixed  
 459 cultures give insight into the response mechanism shared by all cells in a population,  
 460 additional work is needed in the future to study how CSP production and detection by  
 461 individual cells is shaped by their spatial context and history and to unravel how  
 462 individual responses translate into patterns of population synchronization across  
 463 different genotypes and strains.

464 What is the relevance of the information carried by CSP? Alkaline pH and  
 465 antibiotic stress can induce competence by increasing the rate at which single cells  
 466 produce and sense CSP. We expect this to be a general mechanism by which sources  
 467 of stress that are alleviated through competence induce this state (e.g. mobile genetic

elements as hypothesized by Croucher et al.<sup>43</sup>). Upregulating competence in the presence of antibiotics can increase survival by activating the expression of stress response genes<sup>7,18</sup>, facilitating repair of damaged DNA and mediating acquisition of resistance<sup>18,44</sup>. Our findings suggest that strategies to prevent competence development in response to antibiotics can focus on counteracting the effect of antibiotics on the rate at which cells produce or sense CSP. Regarding the benefits of upregulating competence with alkaline pH, these are less clear and could be an example of a non-adaptive response resulting from the inherent biochemical properties of ComAB and possibly ComD. Importantly, CSP can integrate additional environmental cues like oxygen availability through the CiaRH two component system, which represses *comC* post-transcriptionally and is required for virulence expression and host colonization<sup>14,45</sup>. In fact, CiaRH is key for the regulation of competence by multiple environmental signals in other streptococci like *S. mutans*<sup>46</sup>.

Our findings support the view that functional hypotheses stressing individual factors like diffusion or population density underplay the complexity of information integrated by QS systems<sup>4,47-51</sup>. Although the term ‘quorum sensing’ overemphasizes the role of population density, we advocate for keeping it due to its widespread use and the fact that density will modify autoinducer concentration in any autoinducer production system. Crucially, QS should be used in a broad sense that acknowledges that bacteria integrate past and current environmental factors in addition to population density into their QS responses. This view might be very useful for other autoinducer production systems like competence in *Vibrio cholerae*, where the synthesis of the autoinducer, CAI-1, depends on the intracellular levels of cAMP-CRP and therefore might incorporate information on the metabolic status of the cell<sup>52,53</sup>. Also in other systems, clear links between signal production, quorum threshold and environmental

493 conditions have been shown to affect QS <sup>54–58</sup>.

494 Given that many biotic and abiotic factors can modify autoinducer concentrations  
 495 <sup>59</sup>, future work should aim to study the relevance of such factors in the natural context  
 496 where bacteria secrete autoinducers. Such work is crucial to assess whether  
 497 upregulating QS in response to a particular factor provides a benefit for bacteria or is  
 498 merely a result of the biochemical properties of the QS regulatory network. An  
 499 interesting possibility is that, as in other biological systems <sup>60</sup>, bacteria could perform  
 500 collective sensing of the environment through social interactions. In this context, by  
 501 secreting autoinducers cells could share individual estimates of environmental  
 502 conditions (e.g. antibiotic stress) for which upregulating QS is beneficial. Then,  
 503 autoinducer secretion would provide a way to get a more reliable estimate of the  
 504 environmental conditions by allowing a population to pool estimates made by  
 505 individual cells. Importantly, such a role for autoinducer secretion would explain the  
 506 dependency of QS on both cell density and the environment.

507

## 508 **Methods**

### 509 **Bacterial strains and growth conditions**

510 All pneumococcal strains used in this study are derivatives of the clinical isolate *S.*  
 511 *pneumoniae* D39 <sup>26</sup> unless specified otherwise. To monitor competence development,  
 512 strains either contain a transcriptional fusion of the firefly *luc* and the *gfp* gene with the  
 513 late competence gene *ssbB* or a full translational *ssbB-gfp* fusion. Cells were grown in  
 514 in C+Y complex medium at 37°C. C+Y was adapted from Adams and Roe <sup>61</sup> and  
 515 contained the following components: adenosine (65 μM), uridine (107 μM), L-

516 asparagine (331  $\mu\text{M}$ ), L-cysteine (71  $\mu\text{M}$ ), L-glutamine (150  $\mu\text{M}$ ), L-tryptophane  
517 (29.4  $\mu\text{M}$ ), casein hydrolysate (5 g L<sup>-1</sup>), BSA (8 mg L<sup>-1</sup>), biotin (2.46  $\mu\text{M}$ ), nicotinic  
518 acid (4.87  $\mu\text{M}$ ), pyridoxine (3.4  $\mu\text{M}$ ), calcium pantothenate (5.04  $\mu\text{M}$ ), thiamin (1.9  
519  $\mu\text{M}$ ), riboflavin (0.744  $\mu\text{M}$ ), choline (48  $\mu\text{M}$ ), CaCl<sub>2</sub> (113  $\mu\text{M}$ ), K<sub>2</sub>HPO<sub>4</sub> (48.8 mM),  
520 MgCl<sub>2</sub> (2.46 mM), FeSO<sub>4</sub> (1.8  $\mu\text{M}$ ), CuSO<sub>4</sub> (2  $\mu\text{M}$ ), ZnSO<sub>4</sub> (1.74  $\mu\text{M}$ ), MnCl<sub>2</sub> (40  
521  $\mu\text{M}$ ), glucose (11.1 mM), sodium pyruvate (2.7 mM), saccharose (944  $\mu\text{M}$ ), sodium  
522 acetate (24.4 mM) and yeast extract (2.5 g L<sup>-1</sup>).

### 523 **Construction of recombinant strains**

524 To transform *S. pneumoniae*, cells were grown in C+Y medium (pH 6.8) at 37°C to an  
525 OD<sub>595</sub> of 0.1. Then, cells were treated for 12 minutes at 37°C with synthetic CSP-1  
526 (100 ng mL<sup>-1</sup>) and incubated for 20 minutes at 30°C with the transforming DNA. After  
527 incubation with the transforming DNA, cells were grown in C+Y medium (pH 6.8) at  
528 37°C for 90 minutes. *S. pneumoniae* transformants were selected by plating inside  
529 Columbia agar supplemented with 3% of defibrinated sheep blood (Johnny Rottier,  
530 Kloosterzande, The Netherlands) and the appropriate antibiotics. Working stocks of  
531 cells were prepared by growing cells in C+Y (pH 6.8) until an OD<sub>595</sub> of 0.4. Cells were  
532 collected by centrifugation (1595 x g for 10 minutes) and resuspended in fresh C+Y  
533 medium (pH 6.8) with 15% glycerol and stored at -80°C. See the details on the  
534 construction of the strains below and see Supplementary Table 1 for a list of all the  
535 strains used in this study.

### 536 **Strain DSM2**

537 To follow competence development during pneumococcal growth, a transcriptional  
538 fusion of two reporter genes, *luc* (firefly luciferase) and *gfp*, to the late competence  
539 promoter P<sub>ssbB</sub> was used. The plasmid pLA18<sup>27</sup>, containing the P<sub>ssbB</sub>-*luc-gfp* construct

was transformed into *S. pneumoniae* D-PEP1<sup>62</sup> and transformants were selected on Columbia blood agar supplemented with 1 µg mL<sup>-1</sup> tetracycline. The P<sub>ssbB</sub>-*luc-gfp* construct integrates into the *bgaA* locus, and correct transformants were verified by PCR.

#### Strains ADP243 and ADP62

To prevent the production of CSP, the original *comC* gene was replaced by an erythromycin resistance marker, leaving the promoter and therefore the polycistronic nature of *comDE* intact. The upstream region was amplified using primers LAG11 (GGCGGATCCGGCAGTTTGTGTAATAGTAC) and ADP2/48+AscI (ACGTGGCGCGCCGTTCCAATTAACTGTGTTTTTCAT), the downstream region with primers ADP2/47+BamHI (ACGTGGATCCGAAATAAGGGGAAAGAGTAATGGATTATTTG) and LAG54 (AATCGCCATCTTCCAATCCC), and the erythromycin resistance marker with 0292\_ery\_R+BamHI (GCGGATCCTGTCTTTGACCCAATCATTC) and sPG19+AscI (ACGTGGCGCGCCCGGAGGAATTTTCATATGAAC). All three fragments were digested with the proper restriction enzymes (AscI and/or BamHI) and ligated. The Δ*comC*::*ery* fragment containing the erythromycin resistance marker flanked by the sequence up- and downstream of *comC* without altering the natural transcription of *comDE* was transformed into D39 and DLA3<sup>27</sup> resulting in strains ADP243 (Δ*comC*::*ery*) and ADP62 (Δ*bgaA*:: P<sub>ssbB</sub>-*luc*, Δ*comC*::*ery*), respectively. Transformants were selected on Columbia blood agar containing 0.25 µg mL<sup>-1</sup> erythromycin. Correct deletion of *comC* was verified by PCR and sequencing.

#### Strains ADP49 and ADP51

To monitor natural competence in two clinical isolates, the PCR product of the

564 fragment *ssbB-luc-kan* from strain MK134<sup>27</sup> was transformed into the pneumococcal  
565 strain PMEN14 and the *Streptococcus mitis* strain NTCC10712. Transformants were  
566 selected on Columbia blood agar containing 250  $\mu\text{g mL}^{-1}$  kanamycin resulting in  
567 strains ADP49 (PMEN14, *ssbB-luc*) and ADP51 (*S. mitis ssbB-luc*), respectively.

### 568 ***Unencapsulated strains ADP25, ADP26, ADP92***

569 To delete the polysaccharide capsule, the whole *cps* operon was replaced with a  
570 chloramphenicol resistance cassette. The primers used were: ADP1/51  
571 (CGGTCTTCAGTATCAGGAAGGTCAG) and ADP1/52+AscI  
572 (CGATGGCGCGCCCTTCTTTCTCCTTAATAGTGG) to amplify the upstream  
573 region; primers ADP1/53+NotI  
574 (CACGGCGGCCGCGAGAAAGTTTTAAAGGAGAAAATG) and ADP1/54  
575 (GATAGAGACGAGCTGCTGTAAGGC) to amplify the downstream region;  
576 sPG11+AscI (ACGTGGCGCGCCAGGAGGCATATCAAATGAAC) and  
577 sPG12+NotI (ACGTGCGGCCGCTTATAAAAGCCAGTCATTAG) to amplify the  
578 chloramphenicol cassette. Products were digested with the appropriate enzymes (AscI  
579 and/or NotI) and ligated. Strains D39, DLA3 and ADP49 were transformed with the  
580 ligation product and transformants were selected on Columbia blood agar containing  
581 4.5  $\mu\text{g mL}^{-1}$  chloramphenicol resulting in strains ADP25 ( $\Delta cps::chl$ ), ADP26 ( $\Delta bgaA::$   
582  $P_{ssbB-luc}$ ,  $\Delta cps::chl$ ), ADP92 (PMEN14, *ssbB-luc*,  $\Delta cps::chl$ ).

### 583 ***Strains ADP249 and ADP151***

584 To follow competence development of micro-colonies during time-lapse microscopy,  
585 the PCR product of the C-terminal fusion of *ssbB* with *gfp* and a downstream  
586 kanamycin cassette were amplified using chromosomal DNA of strain RA42 as a  
587 template<sup>63</sup> and transformed into the D39 strain and into its unencapsulated variant



ADP25 resulting in strains ADP249 ( $P_{ssbB-ssbB-gfp}$ ) and ADP151 ( $P_{ssbB-ssbB-gfp}$ ,  $\Delta cps::chl$ ), respectively. Transformants were selected on Columbia blood agar containing 250  $\mu\text{g mL}^{-1}$  kanamycin.

#### Strains ADP247 and ADP248

Plasmid pPEP43<sup>62</sup> containing a constitutive promoter driving the expression of the red fluorescent protein mKate2 (cytoplasmic localization) was transformed into strain D39 and its unencapsulated derivative ADP25. pPEP43 integrates into the *cep*-locus, and transformants were selected on Columbia blood agar containing 125  $\mu\text{g mL}^{-1}$  spectinomycin. The resulting strains, ADP235 ( $\Delta cep::p3-mkate2$ ) and ADP244 ( $\Delta cep::p3-mkate2$ ,  $\Delta cps::chl$ ), were transformed with the PCR product  $P_{ssbB-ssbB-gfp}$  including the kanamycin cassette (same as for strain ADP249). Transformants were selected on Columbia blood agar containing 250  $\mu\text{g mL}^{-1}$  kanamycin. Finally, the resulting strains, ADP245 ( $\Delta cep::p3-mkate2$ ,  $P_{ssbB-ssbB-gfp}$ ) and its unencapsulated variant ADP246 ( $\Delta cep::p3-mkate2$ ,  $\Delta cps::chl$ ,  $P_{ssbB-ssbB-gfp}$ ), were transformed with the *comC::ery* fragment described above. This resulted in strains ADP247 ( $\Delta cep::p3-mkate2$ ,  $P_{ssbB-ssbB-gfp}$ ,  $\Delta comC::ery$ ) and ADP248 ( $\Delta cep::p3-mkate2$ ,  $\Delta cps::chl$ ,  $P_{ssbB-ssbB-gfp}$ ,  $\Delta comC::ery$ ). Transformants were selected on Columbia blood agar containing 0.25  $\mu\text{g mL}^{-1}$  erythromycin.

#### Strain ADP95

To use an IPTG-inducible system, we first transformed the codon optimized *lacI* gene<sup>31</sup> into strain DLA3<sup>27</sup>. For that, we PCR-ed the fragment including *lacI* integrated into the *prsA*-locus together with a gentamycin resistance cassette from chromosomal DNA of strain DCI23<sup>31</sup> using primers OLI40 (CCATGGCATCAGCGAGAAGGTGATAC)

611 and OLI41 (GCGGCCGCAGGATAGAAAGGCGAGAG) and transformed the  
612 resulting PCR product to strain DLA3 while selecting for gentamycin (20  $\mu\text{g mL}^{-1}$ )  
613 resulting in strain ADP95 (D39,  $\Delta bgaA::P_{ssbB-luc}$ ,  $\Delta prsA::lacI$ ).

#### 614 ***Strains ADP112 and ADP107***

615 To control the production of *comC*, and thereby CSP, a strain was constructed with an  
616 ectopic copy of *comC* (at the *cep* locus) under control of the IPTG-inducible promoter  
617  $P_{lac}^{31}$ , and the subsequent deletion of the original *comC* (replaced by an erythromycin  
618 resistance cassette). The inducible system was created using BglFusion cloning<sup>62</sup>. To  
619 amplify the *comC* fragment, primers ADP2/38  
620 (CAGTGGATCCGGTTTTTGTAAGTTAGCTTACAAG) and ADP3/31  
621 (CAGTCTCGAGCCCAAATCCAAATAAATCCATTAC) were used using D39  
622 chromosomal DNA as a template. To control the production of *comCDE*, a strain with  
623 an IPTG-inducible *comCDE* was created, with the deletion of the original *comCDE*  
624 locus. The inducible system was created as explained above. To amplify the *comCDE*  
625 fragment, primers ADP2/38  
626 (CAGTGGATCCGGTTTTTGTAAGTTAGCTTACAAG) and ADP2/58  
627 (ACGTCTCGAGGCGGCCCAATTCTTGCTAATTGTC) were used using  
628 chromosomal DNA of D39 as a template. PCR products were digested with BglII and  
629 XhoI and were ligated with similarly digested pPEP1 plasmid containing the promoter  
630  $P_{lac}^{31}$ . The ligations were transformed into strain ADP95 and transformants were  
631 selected on Columbia blood agar containing 125  $\mu\text{g mL}^{-1}$  spectinomycin. To these  
632 strains, either the PCR product  $\Delta comC::ery$  (see above) or a PCR product containing  
633  $\Delta comCDE::chl$  from strain MK135<sup>27</sup> was transformed and transformants were  
634 selected on Columbia blood agar containing either 0.25  $\mu\text{g mL}^{-1}$  erythromycin or 4.5

635  $\mu\text{g mL}^{-1}$  chloramphenicol resulting in strains ADP112 ( $\Delta bgaA::P_{ssbB-luc}$ ,  $\Delta cep::P_{lac-}$   
636  $comC$ ,  $\Delta comC::ery$ ) and ADP107 ( $\Delta bgaA::P_{ssbB-luc}$ ,  $\Delta cep::P_{lac-comCDE}$ ,  
637  $\Delta comCDE::chl$ ), respectively.

### 638 **Strain MK356**

639 To construct MK356 ( $\Delta bgaA::P_{ssbB-luc-gfp}$ ,  $\Delta htrA::ery$ ), *htrA* was replaced with an  
640 erythromycin resistance gene. A region upstream of *htrA* was amplified from genomic  
641 DNA of *S. pneumoniae* D39 using primers *htrA*-up-F (5'-  
642 GAACCTGCGACCGTTCGCTTAGAAGG-3') and *htrA*-up-R+BamHI (5'-  
643 GCGCGGATCCTCCATATGTTTGAATTACTG-3') and a region downstream of *htrA*  
644 was amplified with primers *htrA*-Dwn-F-EcoRI (5'-  
645 CGCGGAATTCGACATCTATGTAAAGAAAGC-3') and *htrA*-Dwn-R (5'-  
646 GCTGTTGATAATTCTACTATATTCTTC-3'). An erythromycin resistance gene was  
647 amplified from plasmid pORI28<sup>64</sup> using primers EmR-F+BamHI (5'-  
648 GCGCGGATCCTATGAACGAGAAAAATATAAACAC-3') and EmR-R+EcoRI  
649 (5'-CGCGGAATTCGCAGTTTATGCATCCCTTAACCTAC-3'). The three fragments  
650 were digested with appropriate restriction enzymes (BamHI and/or EcoRI) and ligated.  
651 The  $\Delta htrA::ery$  fragment, containing the an erythromycin resistance gene flanked by  
652 the sequence up- and downstream of *htrA*, was transformed into strain DSM2.  
653 Transformants were selected on Columbia blood agar containing  $0.25 \mu\text{g mL}^{-1}$   
654 erythromycin. Correct deletion of *htrA* was verified by PCR.

### 655 **Density and luminescence assays**

656 Cells were pre-cultured in acid C+Y (pH 6.8) or in non-acid C+Y (pH 7.9) at 37°C to  
657 an OD<sub>595nm</sub> of 0.1. Right before inoculation, they were collected by centrifugation  
658 (8000 rpm for 3 minutes) and resuspended in fresh C+Y (pH 7.9). Unless indicated

otherwise all experiments were started with an inoculation density of OD<sub>595</sub> 0.002 with cells from an acid preculture. Luciferase assays were performed in 96-wells plates with a Tecan Infinite 200 PRO luminometer at 37°C as described before<sup>62</sup>. Luciferin was added at a concentration of 0.5 mg mL<sup>-1</sup> to monitor competence by means of luciferase activity. Optical density (OD<sub>595nm</sub>) and luminescence (relative luminescence units [RLU]) were measured every 10 minutes. The time and density of competence initiation correspond to the first time point where the RLU signal is equal or above 200 units. RLU is used instead of RLU/OD for Figure 2 because 1) when competence develops the rate at which the RLU signal increases is faster than the growth rate and 2) due to the very low inoculation densities used for Figure 2 the RLU/OD can be very high at the start (clearly before competence has developed). The value of 200 units was chosen because once this value is reached competence always developed. The effect of pH on competence development was studied by inoculating cells in C+Y at a range of pH values from 6.8 to 8.5. pH was adjusted by adding HCl and NaOH. The effect of antibiotics was studied by adding streptomycin (3 µg mL<sup>-1</sup>) and HPUra (0.075 µg mL<sup>-1</sup>) to C+Y.

#### **Detection of CSP in cell free supernatant**

*S. pneumoniae* D39 wild-type and its *comC* deficient version, ADP243, were grown in non-acid C+Y (pH 7.9) at 37°C to an OD<sub>595nm</sub> of 0.1. Cells were spun down by centrifugation at 20000 x g for 5 min. The supernatant was sterilized by filtering twice through 0.2 µm filters. The supernatant was plated on Columbia blood agar to confirm that no viable cells were present. For both the wild-type and the *comC*-deficient strain, the cell-free supernatant was diluted 1:1 with 2x concentrated C+Y medium containing luciferin, and pH was adjusted to the indicated value by addition of HCl. The indicator

683 strain DSM2 pre-grown in C+Y pH 6.8 was then inoculated, and growth and luciferase  
684 activity was monitored as described before.

### 685 **Time-lapse fluorescence microscopy**

686 A polyacrylamide slide was used as a semi-solid growth surface to spot the cells for  
687 time-lapse microscopy. This slide was prepared with C+Y (pH 7.9) and 10%  
688 acrylamide as reported previously<sup>65</sup>. Cells were pre-cultured in acid C+Y (pH 6.8) and  
689 right before inoculation on the slide they were resuspended in fresh C+Y (pH 7.9) as  
690 explained before. Phase contrast, GFP and RFP images were obtained using a  
691 Deltavision Elite microscope (GE Healthcare, USA). Time-lapse videos were recorded  
692 by taking images every 10 minutes after inoculation unless specified otherwise. File  
693 conversions were done using Fiji and analysis of the resulting images was done using  
694 Oufti<sup>66</sup>.

### 695 **Mathematical model**

696 A mathematical model of the network of competence regulation (Figure 1) was  
697 developed as a system of ODEs. The model incorporates the protein interactions  
698 involved in sensing CSP via the two-component system formed by ComD and ComE  
699 and exporting it via ComC and ComAB. Additionally, it explicitly models the  
700 interaction of ComE and ComE~P with the gene promoters of *comAB*, *comCDE* and  
701 *comX*. This is important since ComE~P binds these promoters as a dimer introducing  
702 non-linearity into the system, which underlies the observed bistability. Population  
703 growth is logistic and it is assumed that cells are homogeneous and that they export all  
704 CSP they produce to a common extracellular pool. See Supplementary Note 1 for the  
705 equations and further description.

706

707    **Data availability**

708    The authors declare that the data supporting the findings of the study are available in  
709    this article and its Supporting Information files, or from the corresponding authors  
710    upon request.

711

712

## 713 **Author Contributions**

714 SMG, AD, RAS, MK, GSvD, and JWV designed research; SMG, AD, RAS and MK  
715 performed experiments; SMG and GSvD developed the model; SM, AD, RAS, MK,  
716 FJW, GSvD, and JWV analyzed data; and SMG, FJW, GSvD and JWV wrote the  
717 paper.

718

## 719 **Acknowledgments**

720 We thank Martin Ackermann, Melanie Blokesch and two anonymous reviewers for  
721 helpful comments on an earlier version of this manuscript before submission to this  
722 journal, and Katrin Beilharz for the *htrA::ery* construct. SMG and GSvD were  
723 supported by Starting Independent Researcher Grant 309555 of the European Research  
724 Council and a VIDI fellowship (864.11.012) of the Netherlands Organization for  
725 Scientific Research (NWO). Work in the Veening lab is supported by the EMBO  
726 Young Investigator Program, a VIDI fellowship (864.12.001) and ERC starting grant  
727 337399-PneumoCell.

728

## 729 **Conflicts of interest**

730 The authors state no conflicts of interest.

731

## 732 **References**

- 733 1. Fuqua, W. C., Winans, S. C. & Greenberg, E. P. Quorum sensing in bacteria: the  
734 LuxR-LuxI family of cell density-responsive transcriptional regulators. *J.*  
735 *Bacteriol.* **176**, 269–275 (1994).
- 736 2. Waters, C. M. & Bassler, B. L. Quorum sensing: cell-to-cell communication in  
737 bacteria. *Annu. Rev. Cell Dev. Biol.* **21**, 319–346 (2005).
- 738 3. Redfield, R. J. Is quorum sensing a side effect of diffusion sensing? *Trends*  
739 *Microbiol.* **10**, 365–370 (2002).
- 740 4. Hense, B. A. *et al.* Does efficiency sensing unify diffusion and quorum sensing?  
741 *Nat. Rev. Microbiol.* **5**, 230–239 (2007).
- 742 5. Alberghini, S. *et al.* Consequences of relative cellular positioning on quorum  
743 sensing and bacterial cell-to-cell communication. *FEMS Microbiol. Lett.* **292**, 149–  
744 161 (2009).
- 745 6. Decho, A. W. *et al.* Autoinducers extracted from microbial mats reveal a surprising  
746 diversity of N-acylhomoserine lactones (AHLs) and abundance changes that may  
747 relate to diel pH. *Environ. Microbiol.* **11**, 409–420 (2009).
- 748 7. Peterson, S. N. *et al.* Identification of competence pheromone responsive genes in  
749 *Streptococcus pneumoniae* by use of DNA microarrays. *Mol. Microbiol.* **51**, 1051–  
750 1070 (2004).
- 751 8. Håvarstein, L. S., Coomaraswamy, G. & Morrison, D. A. An unmodified  
752 heptadecapeptide pheromone induces competence for genetic transformation in  
753 *Streptococcus pneumoniae*. *Proc. Natl. Acad. Sci. U. S. A.* **92**, 11140–11144  
754 (1995).
- 755 9. Pestova, E. V., Håvarstein, L. S. & Morrison, D. A. Regulation of competence for  
756 genetic transformation in *Streptococcus pneumoniae* by an auto-induced peptide



- 757       pheromone and a two-component regulatory system. *Mol. Microbiol.* **21**, 853–862  
758       (1996).
- 759   10. Håvarstein, L. & Morrison, D. Quorum sensing and peptide pheromones in  
760       streptococcal competence for genetic transformation. in *Cell-cell signaling in*  
761       *bacteria* 9–26 (ASM Press, 1999).
- 762   11. Chen, J. D. & Morrison, D. A. Modulation of competence for genetic  
763       transformation in *Streptococcus pneumoniae*. *J. Gen. Microbiol.* **133**, 1959–1967  
764       (1987).
- 765   12. Claverys, J.-P. & Havarstein, L. S. Extracellular-peptide control of competence for  
766       genetic transformation in *Streptococcus pneumoniae*. *Front. Biosci. J. Virtual Libr.*  
767       **7**, d1798-1814 (2002).
- 768   13. Prudhomme, M., Attaiech, L., Sanchez, G., Martin, B. & Claverys, J. P. Antibiotic  
769       stress induces genetic transformability in the human pathogen *Streptococcus*  
770       *pneumoniae*. *Science* **313**, 89–92 (2006).
- 771   14. Echenique, J. R., Chapuy-Regaud, S. & Trombe, M. C. Competence regulation by  
772       oxygen in *Streptococcus pneumoniae*: involvement of *ciaRH* and *comCDE*. *Mol.*  
773       *Microbiol.* **36**, 688–696 (2000).
- 774   15. Claverys, J.-P., Prudhomme, M. & Martin, B. Induction of competence regulons as  
775       a general response to stress in gram-positive bacteria. *Annu. Rev. Microbiol.* **60**,  
776       451–475 (2006).
- 777   16. Johnston, C., Martin, B., Fichant, G., Polard, P. & Claverys, J.-P. Bacterial  
778       transformation: distribution, shared mechanisms and divergent control. *Nat. Rev.*  
779       *Microbiol.* **12**, 181–196 (2014).

- 780 17. Johnsborg, O. & Havarstein, L. S. Regulation of natural genetic transformation and  
781 acquisition of transforming DNA in *Streptococcus pneumoniae*. *FEMS*  
782 *MicrobiolRev* **33**, 627–642 (2009).
- 783 18. Engelman, D. J. P. & Rozen, D. E. Competence increases survival during stress in  
784 *Streptococcus pneumoniae*. *Evol. Int. J. Org. Evol.* **65**, 3475–3485 (2011).
- 785 19. Prudhomme, M., Berge, M., Martin, B. & Polard, P. Pneumococcal Competence  
786 Coordination Relies on a Cell-Contact Sensing Mechanism. *PLoS Genet.* **12**,  
787 e1006113 (2016).
- 788 20. Yang, J., Evans, B. A. & Rozen, D. E. Signal diffusion and the mitigation of social  
789 exploitation in pneumococcal competence signalling. *Proc. Biol. Sci.* **277**, 2991–  
790 2999 (2010).
- 791 21. Hui, F. M., Zhou, L. & Morrison, D. A. Competence for genetic transformation in  
792 *Streptococcus pneumoniae*: organization of a regulatory locus with homology to  
793 two lactococcal A secretion genes. *Gene* **153**, 25–31 (1995).
- 794 22. Ween, O., Gaustad, P. & Havarstein, L. S. Identification of DNA binding sites for  
795 ComE, a key regulator of natural competence in *Streptococcus pneumoniae*. *Mol.*  
796 *Microbiol.* **33**, 817–827 (1999).
- 797 23. Martin, B. *et al.* ComE/ComE~P interplay dictates activation or extinction status of  
798 pneumococcal X-state (competence). *Mol. Microbiol.* **87**, 394–411 (2013).
- 799 24. Martin, B., Garcia, P., Castanie, M. P. & Claverys, J. P. The *recA* gene of  
800 *Streptococcus pneumoniae* is part of a competence-induced operon and controls  
801 lysogenic induction. *Mol Microbiol* **15**, 367–379 (1995).
- 802 25. Mirouze, N. *et al.* Direct involvement of DprA, the transformation-dedicated RecA  
803 loader, in the shut-off of pneumococcal competence. *Proc. Natl. Acad. Sci. U. S. A.*  
804 **110**, E1035-1044 (2013).

26. Avery, A. T., MacLeod, C. M. & McCarty, M. Studies on the chemical nature of the substance inducing transformation of pneumococcal types. Induction of transformation by a desoxyribonucleic acid fraction isolated from *Pneumococcus* type III. *J.Exp.Med.* **79**, 137–158 (1944).
27. Slager, J., Kjos, M., Attaiech, L. & Veening, J.-W. Antibiotic-induced replication stress triggers bacterial competence by increasing gene dosage near the origin. *Cell* **157**, 395–406 (2014).
28. Tomasz, A. & Mosser, J. L. On the nature of the pneumococcal activator substance. *Proc Natl Acad Sci U A* **55**, (1966).
29. Maamar, H. & Dubnau, D. Bistability in the *Bacillus subtilis* K-state (competence) system requires a positive feedback loop. *Mol.Microbiol.* **56**, 615–624 (2005).
30. Smits, W. K. *et al.* Stripping Bacillus: ComK auto-stimulation is responsible for the bistable response in competence development. *Mol.Microbiol.* **56**, 604–614 (2005).
31. Liu, X. *et al.* High-throughput CRISPRi phenotyping identifies new essential genes in *Streptococcus pneumoniae*. *Mol. Syst. Biol.* **13**, 931 (2017).
32. Lin, D. Y., Huang, S. & Chen, J. Crystal structures of a polypeptide processing and secretion transporter. *Nature* **523**, 425–430 (2015).
33. Stevens, K. E., Chang, D., Zwack, E. E. & Sebert, M. E. Competence in *Streptococcus pneumoniae* is regulated by the rate of ribosomal decoding errors. *mBio* **2**, (2011).
34. Ferrell, J. E. Self-perpetuating states in signal transduction: positive feedback, double-negative feedback and bistability. *CurrOpinCell Biol* **14**, 140–148 (2002).

- 828 35. Marks, L. R., Reddinger, R. M. & Hakansson, A. P. High levels of genetic  
829 recombination during nasopharyngeal carriage and biofilm formation in  
830 *Streptococcus pneumoniae*. *mBio* **3**, (2012).
- 831 36. Guiral, S., Mitchell, T. J., Martin, B. & Claverys, J. P. Competence-programmed  
832 predation of noncompetent cells in the human pathogen *Streptococcus*  
833 *pneumoniae*: genetic requirements. *Proc.Natl.Acad.Sci.U.S.A* **102**, 8710–8715  
834 (2005).
- 835 37. Wei, H. & Håvarstein, L. S. Fratricide is essential for efficient gene transfer  
836 between pneumococci in biofilms. *Appl. Environ. Microbiol.* **78**, 5897–5905  
837 (2012).
- 838 38. Kjos, M. *et al.* Expression of *Streptococcus pneumoniae* Bacteriocins Is Induced  
839 by Antibiotics via Regulatory Interplay with the Competence System. *PLoS*  
840 *Pathog.* **12**, e1005422 (2016).
- 841 39. Wholey, W.-Y., Kochan, T. J., Storck, D. N. & Dawid, S. Coordinated Bacteriocin  
842 Expression and Competence in *Streptococcus pneumoniae* Contributes to Genetic  
843 Adaptation through Neighbor Predation. *PLoS Pathog.* **12**, e1005413 (2016).
- 844 40. Gardan, R. *et al.* Extracellular life cycle of ComS, the competence-stimulating  
845 peptide of *Streptococcus thermophilus*. *J. Bacteriol.* **195**, 1845–1855 (2013).
- 846 41. Son, M., Ghoreishi, D., Ahn, S.-J., Burne, R. A. & Hagen, S. J. Sharply Tuned pH  
847 Response of Genetic Competence Regulation in *Streptococcus mutans*: a  
848 Microfluidic Study of the Environmental Sensitivity of comX. *Appl. Environ.*  
849 *Microbiol.* **81**, 5622–5631 (2015).
- 850 42. Shields, R. C. & Burne, R. A. Growth of *Streptococcus mutans* in Biofilms Alters  
851 Peptide Signaling at the Sub-population Level. *Front. Microbiol.* **7**, 1075 (2016).

- 852 43. Croucher, N. J. *et al.* Horizontal DNA Transfer Mechanisms of Bacteria as  
853 Weapons of Intragenomic Conflict. *PLoS Biol.* **14**, e1002394 (2016).
- 854 44. Cornick, J. E. & Bentley, S. D. *Streptococcus pneumoniae*: the evolution of  
855 antimicrobial resistance to beta-lactams, fluoroquinolones and macrolides.  
856 *Microbes Infect. Inst. Pasteur* **14**, 573–583 (2012).
- 857 45. Halfmann, A., Kovacs, M., Hakenbeck, R. & Bruckner, R. Identification of the  
858 genes directly controlled by the response regulator CiaR in *Streptococcus*  
859 *pneumoniae*: five out of 15 promoters drive expression of small non-coding RNAs.  
860 *Mol Microbiol* **66**, 110–126 (2007).
- 861 46. Ahn, S.-J., Wen, Z. T. & Burne, R. A. Multilevel control of competence  
862 development and stress tolerance in *Streptococcus mutans* UA159. *Infect. Immun.*  
863 **74**, 1631–1642 (2006).
- 864 47. Lazazzera, B. A. Quorum sensing and starvation: signals for entry into stationary  
865 phase. *Curr. Opin. Microbiol.* **3**, 177–182 (2000).
- 866 48. Platt, T. G. & Fuqua, C. What's in a name? The semantics of quorum sensing.  
867 *Trends Microbiol.* **18**, 383–387 (2010).
- 868 49. West, S. A., Winzer, K., Gardner, A. & Diggle, S. P. Quorum sensing and the  
869 confusion about diffusion. *Trends Microbiol.* **20**, 586–594 (2012).
- 870 50. Williams, P. & Cámara, M. Quorum sensing and environmental adaptation in  
871 *Pseudomonas aeruginosa*: a tale of regulatory networks and multifunctional signal  
872 molecules. *Curr. Opin. Microbiol.* **12**, 182–191 (2009).
- 873 51. Hense, B. A. & Schuster, M. Core principles of bacterial autoinducer systems.  
874 *Microbiol. Mol. Biol. Rev. MMBR* **79**, 153–169 (2015).
- 875 52. Liang, W., Pascual-Montano, A., Silva, A. J. & Benitez, J. A. The cyclic AMP  
876 receptor protein modulates quorum sensing, motility and multiple genes that affect

- 877 intestinal colonization in *Vibrio cholerae*. *Microbiol. Read. Engl.* **153**, 2964–2975  
878 (2007).
- 879 53. Suckow, G., Seitz, P. & Blokesch, M. Quorum sensing contributes to natural  
880 transformation of *Vibrio cholerae* in a species-specific manner. *J. Bacteriol.* **193**,  
881 4914–4924 (2011).
- 882 54. Pai, A., Tanouchi, Y. & You, L. Optimality and robustness in quorum sensing  
883 (QS)-mediated regulation of a costly public good enzyme. *Proc. Natl. Acad. Sci.*  
884 *U. S. A.* **109**, 19810–19815 (2012).
- 885 55. Lee, J. *et al.* A cell-cell communication signal integrates quorum sensing and stress  
886 response. *Nat. Chem. Biol.* **9**, 339–343 (2013).
- 887 56. Xavier, J. B., Kim, W. & Foster, K. R. A molecular mechanism that stabilizes  
888 cooperative secretions in *Pseudomonas aeruginosa*. *Mol. Microbiol.* **79**, 166–179  
889 (2011).
- 890 57. van Delden, C., Comte, R. & Bally, A. M. Stringent response activates quorum  
891 sensing and modulates cell density-dependent gene expression in *Pseudomonas*  
892 *aeruginosa*. *J. Bacteriol.* **183**, 5376–5384 (2001).
- 893 58. Dunlap, P. V. & Kuo, A. Cell density-dependent modulation of the *Vibrio fischeri*  
894 luminescence system in the absence of autoinducer and LuxR protein. *J. Bacteriol.*  
895 **174**, 2440–2448 (1992).
- 896 59. Boyer, M. & Wisniewski-Dyé, F. Cell-cell signalling in bacteria: not simply a  
897 matter of quorum. *FEMS Microbiol. Ecol.* **70**, 1–19 (2009).
- 898 60. Berdahl, A., Torney, C. J., Ioannou, C. C., Faria, J. J. & Couzin, I. D. Emergent  
899 sensing of complex environments by mobile animal groups. *Science* **339**, 574–576  
900 (2013).

- 901 61. Adams, M. H. & Roe, A. S. A Partially Defined Medium for Cultivation of  
902 *Pneumococcus*. *J. Bacteriol.* **49**, 401–409 (1945).
- 903 62. Sorg, R. A., Kuipers, O. P. & Veening, J.-W. Gene Expression Platform for  
904 Synthetic Biology in the Human Pathogen *Streptococcus pneumoniae*. *ACS Synth.*  
905 *Biol.* **4**, 228–239 (2015).
- 906 63. Aprianto, R., Slager, J., Holsappel, S. & Veening, J.-W. Time-resolved dual RNA-  
907 seq reveals extensive rewiring of lung epithelial and pneumococcal transcriptomes  
908 during early infection. *Genome Biol.* **17**, 198 (2016).
- 909 64. Leenhouts, K. *et al.* A general system for generating unlabelled gene replacements  
910 in bacterial chromosomes. *Mol GenGenet* **253**, 217–224 (1996).
- 911 65. Sorg, R. A. & Veening, J.-W. Microscale insights into pneumococcal antibiotic  
912 mutant selection windows. *Nat. Commun.* **6**, 8773 (2015).
- 913 66. Paintdakhi, A. *et al.* Oufiti: an integrated software package for high-accuracy, high-  
914 throughput quantitative microscopy analysis. *Mol. Microbiol.* **99**, 767–777 (2016).
- 915 67. Guiral, S., Hénard, V., Granadel, C., Martin, B. & Claverys, J.-P. Inhibition of  
916 competence development in *Streptococcus pneumoniae* by increased basal-level  
917 expression of the ComDE two-component regulatory system. *Microbiol. Read.*  
918 *Engl.* **152**, 323–331 (2006).
- 919

## 920 **Figure legends**

921

922 **Figure 1. Network of competence regulation in *S. pneumoniae*.** ComC (C) binds the  
 923 membrane protein complex ComAB, and it is processed and exported as CSP to the  
 924 extracellular space. CSP binds to the histidine kinase ComD, which is located in the  
 925 membrane as a dimer. Upon CSP binding, ComD autophosphorylates and transfers the  
 926 phosphate group to the response regulator ComE <sup>9,23</sup>. The phosphorylated form of  
 927 ComE (ComE~P) dimerizes and activates transcription of *comAB*, *comCDE* and *comX*  
 928 by binding to their promoters <sup>8,9</sup>. Unphosphorylated ComE can also bind these  
 929 promoters, repressing their transcription <sup>23,67</sup>. Synthesis of the alternative sigma factor  
 930 ComX directs transcription of genes required for genetic transformation as well as  
 931 other functions <sup>7,24</sup>. Two key features of this network are the presence of a positive  
 932 feedback loop (since increasing CSP detection leads to increasing CSP production) and  
 933 of non-linearity (since ComE~P interacts with the gene promoters as a dimer).

934

935 **Figure 2. Competence is regulated by cell density. (a,b)** Growth curves (OD<sub>595nm</sub>)  
 936 and competence expression measured as relative luminescence units (RLU) expressed  
 937 from the promoter of the late competence gene *ssbB* for populations inoculated at a  
 938 range of densities and grown in C+Y medium with initial pH 7.9. In **a**, cells were  
 939 precultured in acid conditions (pH 6.8), while in **b** cells were precultured in non-acid  
 940 conditions (pH 7.9). Four replicates are shown for each of seven inoculation densities  
 941 (OD<sub>595nm</sub>): 0.1 (Green), 0.05 (Red), 0.01 (Blue), 10<sup>-3</sup> (Purple), 10<sup>-4</sup> (Light green), 10<sup>-5</sup>  
 942 (Yellow) and 10<sup>-6</sup> (Brown). Competence does not develop in cells coming from acid  
 943 preculture and inoculated at a density of 0.1. (c) Effect of inoculation density on the



time until competence initiation (left panel) and the population density at which competence was initiated (right panel). Competence initiation was defined as the time where the RLU signal exceeded 200 units. Note that our luminometer has enough sensitivity to detect light from competent cells at a density of  $1.56 \times 10^{-3}$  or higher even if they correspond to a subpopulation (Supplementary Fig. 2). **(d)** Predictions of the mathematical model concerning the effect of inoculation density on the timing of competence initiation (left panel) and the density at which competence initiates (right panel). In the model, competence initiation was defined as the time where the total concentration of ComX times the population density exceeds 2000 units. Non-acid preculture is simulated in the model by setting the initial amount of all proteins in the competence regulatory network to the value they attain when cells are competent. **(e)** The model predicts that populations inoculated at lower densities will reach a threshold CSP concentration (dotted line) at a lower density than populations inoculated at higher densities.

958

**Figure 3. Competence can propagate by CSP diffusion without the necessity of cell-to-cell contact.** **(a)** Phase contrast and GFP images (left panel) of a set of neighboring microcolonies of D39 with a fusion of the late competence gene *ssbB* to *gfp* ( $P_{ssbB}$ -*SsbB*-*gfp*). The first images ( $t = 0$  min) were taken right after inoculation on the microscopy slide and the second ones correspond to the moment of competence initiation ( $t = 65$  min). Images were taken every 5 minutes. Crucially, when competence starts the microcolonies are not in direct physical contact with each other. Analysis of the fluorescence signal across the entire population (right panel) shows that once competence starts, after 60 minutes from inoculation, the distribution of fluorescence intensity moves to higher intensity values through time. We set as a

969 threshold for counting competent cells a fluorescence signal 50% above background.  
 970 After 85 minutes, we counted 97 out of 99 cells as competent cells. (b) Distribution of  
 971 fluorescence signal within each microcolony in the window of competence initiation.  
 972 The microcolony numbers correspond to the ones indicated in the phase contrast image  
 973 in panel a). Competence initiates in all microcolonies within a window of 5 minutes.  
 974 (c) Time-lapse fluorescence microscopy tracking competence development in two  
 975 colonies with a fusion of the late competence gene *ssbB* to *gfp*: one formed by cells of  
 976 D39 (ADP249) and one formed by cells of a *comC* deficient D39 (ADP247). The two  
 977 strains are distinguishable because ADP247 constitutively expresses a red fluorescent  
 978 protein. Competence developed first in D39 and then it propagated to the *comC*  
 979 mutant after 20 minutes without the necessity of cell-cell contact. Note that we  
 980 checked that the *comC* deficient D39 (ADP247) does not become competent by itself  
 981 when grown without D39 (Supplementary Fig. 4 and Supplementary Movies 3 and 4).  
 982 The scale bar is 5  $\mu$ m in all images.

983

984 **Figure 4. Competence is upregulated by higher pH.** (a) Effect of initial medium pH  
 985 on growth curves (left panel) and the dynamics of competence expression (middle  
 986 panel). Competence expression was quantified as relative luminescence units (RLU)  
 987 normalized by cell density. In the right panel, competence expression is plotted in  
 988 relation to cell density. All populations were grown at the indicated initial pH and  
 989 inoculated at a density of  $OD_{595nm}$  0.002. Three replicates are shown for each initial  
 990 pH. (b) Effect of initial medium pH on the population density at which competence  
 991 was initiated (the density at which RLU exceeded 200 units). Competence did not  
 992 develop at pH 7.4 and below. Note that the indicated pH is the initial pH of the

993 medium, which does not stay constant due to acidification by growth (Supplementary  
994 Fig. 7). Although the pH drops considerably in fully-grown cultures, acidification is  
995 still minor at the density where competence develops. **c)** Predictions of the model on  
996 the effect of the rate of CSP export,  $r_e$ , and thus the pH, on the density of competence  
997 initiation. Competence does not develop anymore below a threshold rate of CSP  
998 export.

999

1000 **Figure 5. Competence is simultaneously regulated by cell density, pH and**  
1001 **antibiotic stress. (a,b)** Predictions of the mathematical model **(a)** and experimental  
1002 data **(b)** on the dependency of the time of competence initiation on inoculation density,  
1003 initial pH and antibiotic stress. The x-axis in **a** corresponds to the rate of CSP export in  
1004 the model,  $r_e$ , which is a proxy for pH. The color scales with the time of competence  
1005 initiation with more intense red corresponding to faster development of competence.  
1006 Black represents no competence development. In **b**, each box corresponds to the  
1007 average initiation time of three replicates. Both the model and the experimental data  
1008 show that competence develops faster at higher pH and higher inoculation densities. **c)**  
1009 Antibiotics induce competence at pH values that repress natural competence  
1010 development. **d)** At pH values that are not repressive for competence development (pH  
1011  $> 7.4$ ), competence develops faster in the presence of antibiotics. The stars indicate  
1012 which conditions are plotted in **c** and **d**. The concentrations of streptomycin and  
1013 HPUra are  $3 \mu\text{g mL}^{-1}$  and  $0.075 \mu\text{g mL}^{-1}$ , respectively. We chose these sub-MIC  
1014 concentrations to minimize the effect of antibiotic stress on growth.

1015

1016 **Figure 6. A bistable regime for competence development. (a)** Extracellular

1017 concentration of CSP in response to the rate of CSP export. The model predicts the  
1018 existence of a region where competence always switches on regardless of the initial  
1019 conditions (which would correspond to  $\text{pH} > 7.4$ ) and of a bistable region (bordered by  
1020 the dashed lines). In the latter, the initial conditions can either switch on or not CSP  
1021 production and subsequently competence development. (Inset) In particular, the model  
1022 predicts that in this region non-acid cell history can allow competence development if  
1023 enough cells are inoculated since they can produce enough CSP to remain competent.  
1024 The inoculation densities are 0.1 (Blue) and 0.01 (Brown) and both the number of  
1025 ComX molecules (solid line) and the CSP concentration (dashed line) are shown. **b)**  
1026 Growth curves and competence expression measured as RLU units normalized by  
1027 density for cells coming from acid preculture ( $\text{pH} 6.8$ ) and inoculated in medium at  $\text{pH}$   
1028  $7.4$  with different initial concentrations of CSP. Three replicates are shown per  
1029 treatment and all the cultures are inoculated at  $\text{OD}_{595}$  0.002. **c)** Growth curves and  
1030 competence expression measured as RLU units normalized by density for cells coming  
1031 from non-acid preculture ( $\text{pH} 7.9$ ) and inoculated in medium at  $\text{pH} 7.4$  at different  
1032 initial densities. Three replicates are shown per inoculation density. Competence does  
1033 not develop for cells inoculated at the same densities but coming from acid preculture  
1034 ( $\text{pH} 6.8$ ) (Figure 5b, left panel, second column).

1035

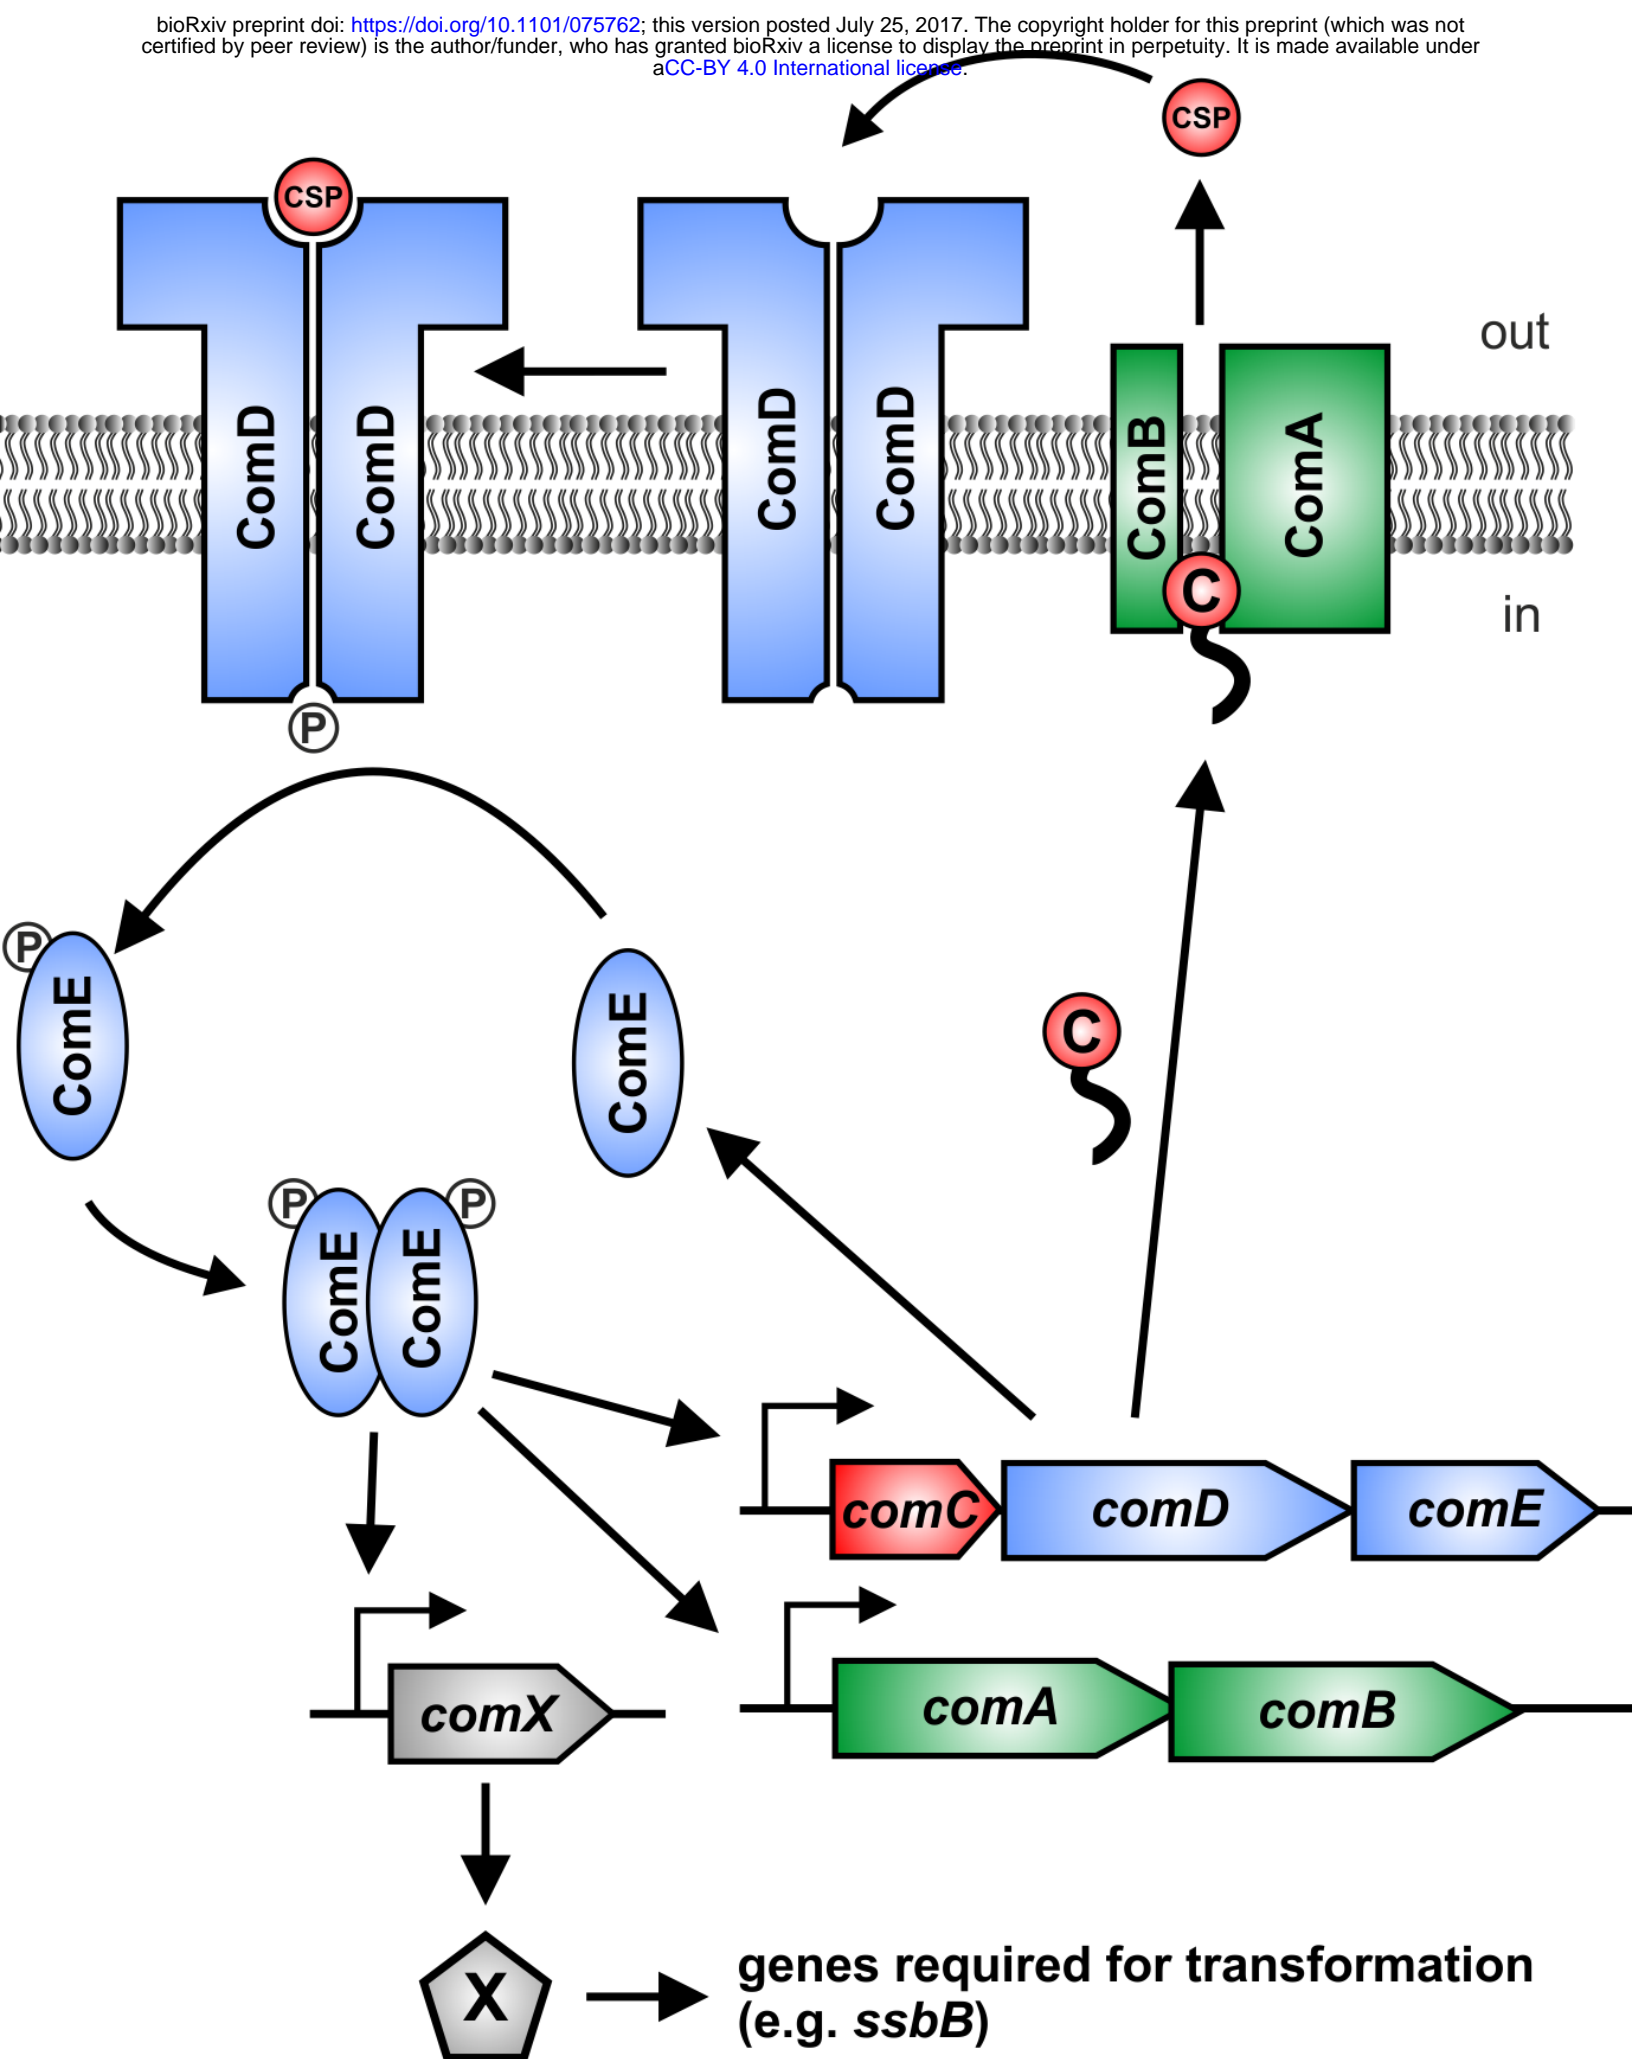

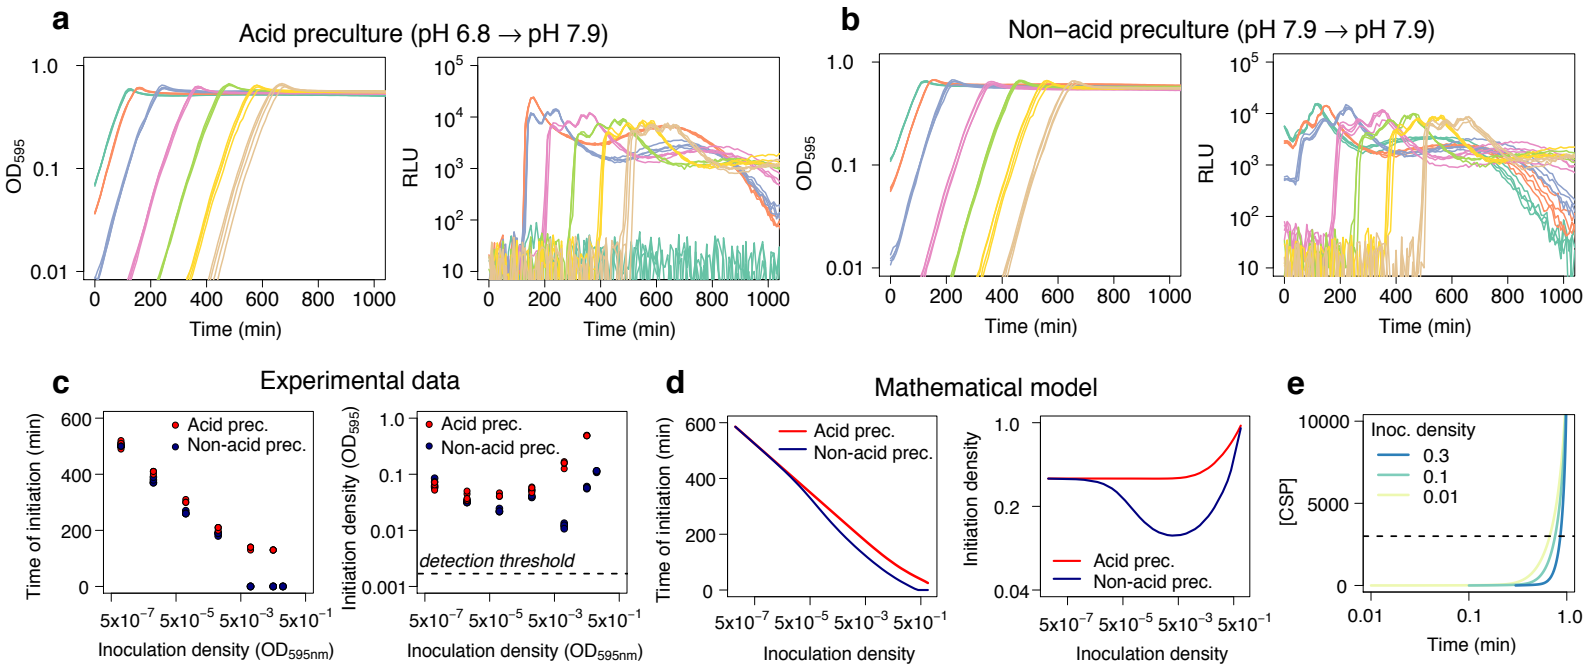

**a**

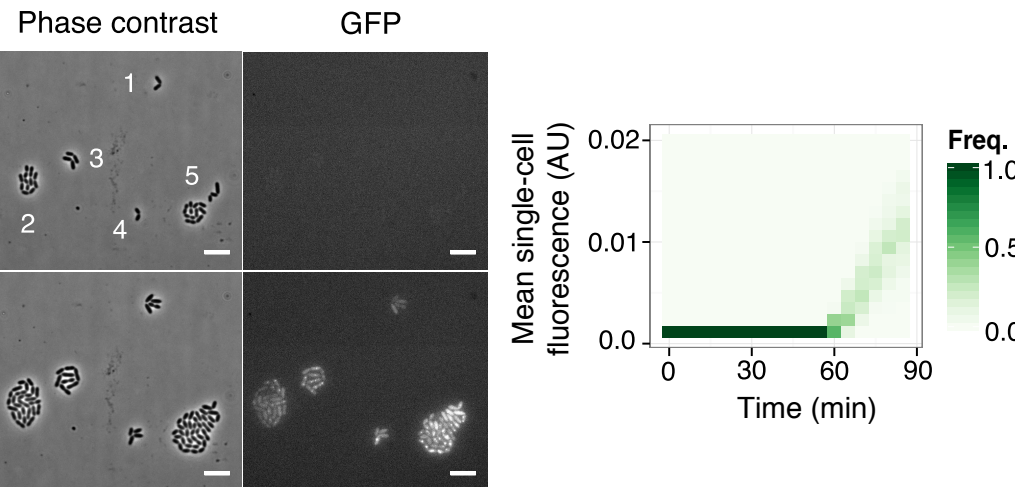

**b**

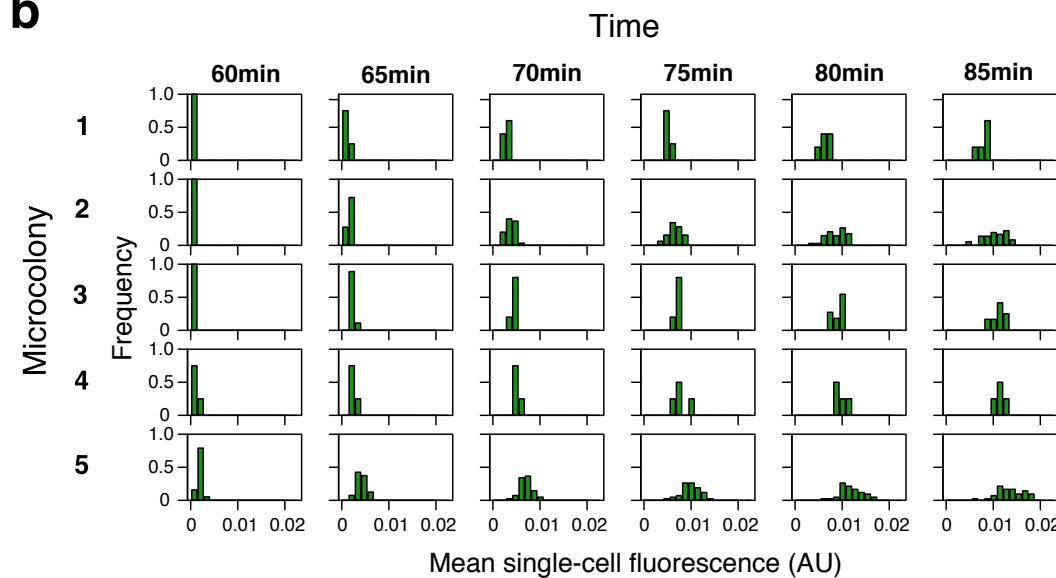

**c**

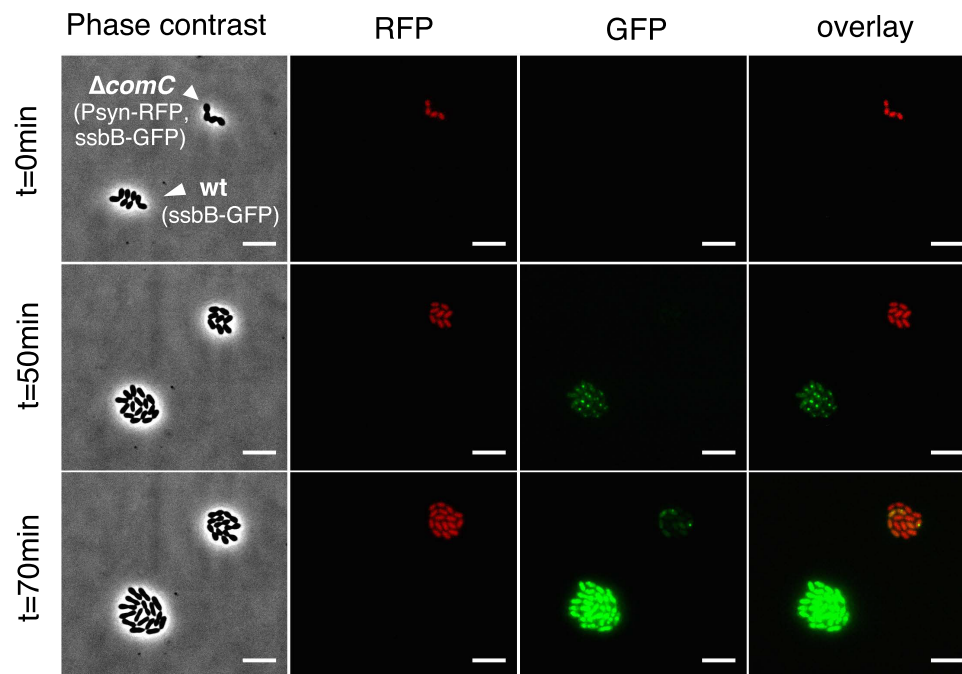

**a**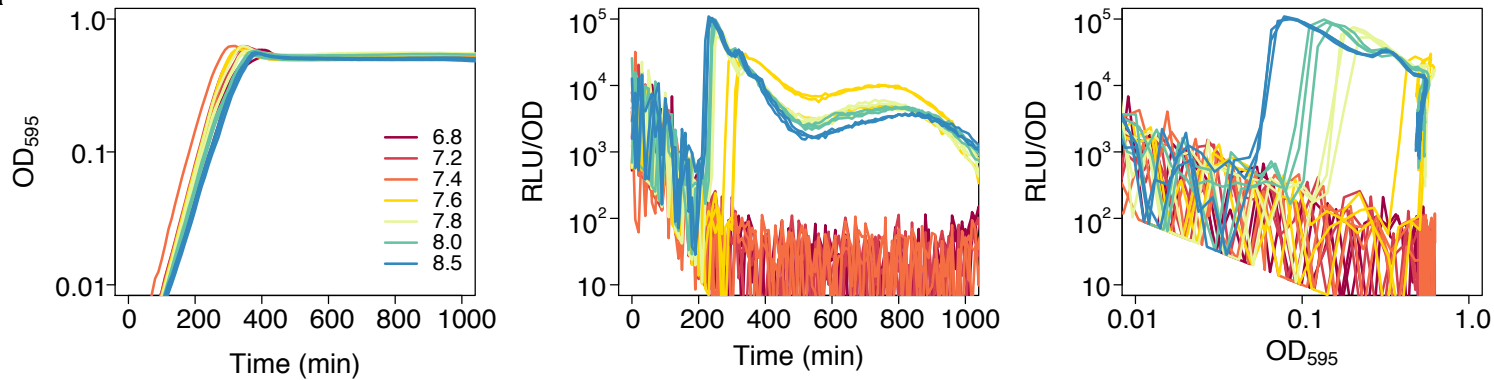**b**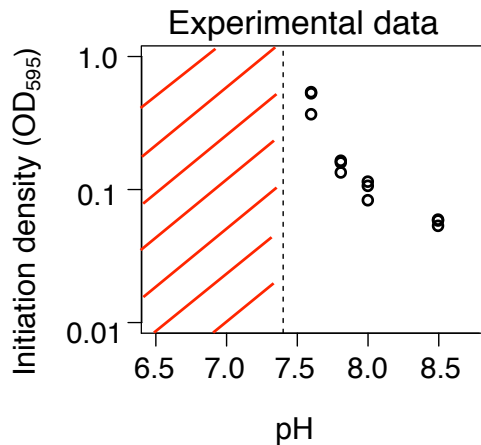**c**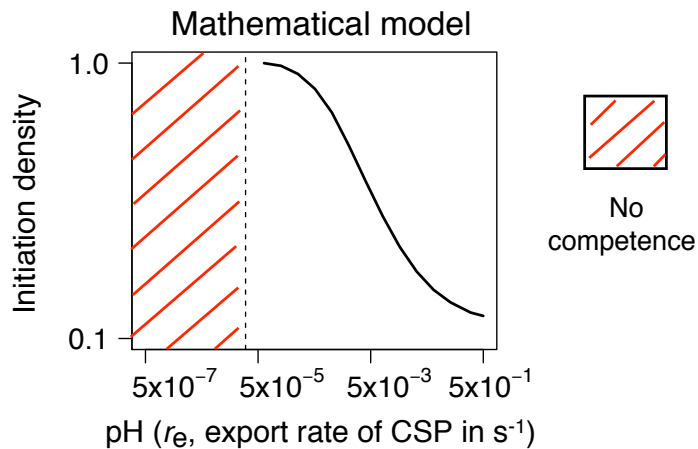



## a Mathematical model

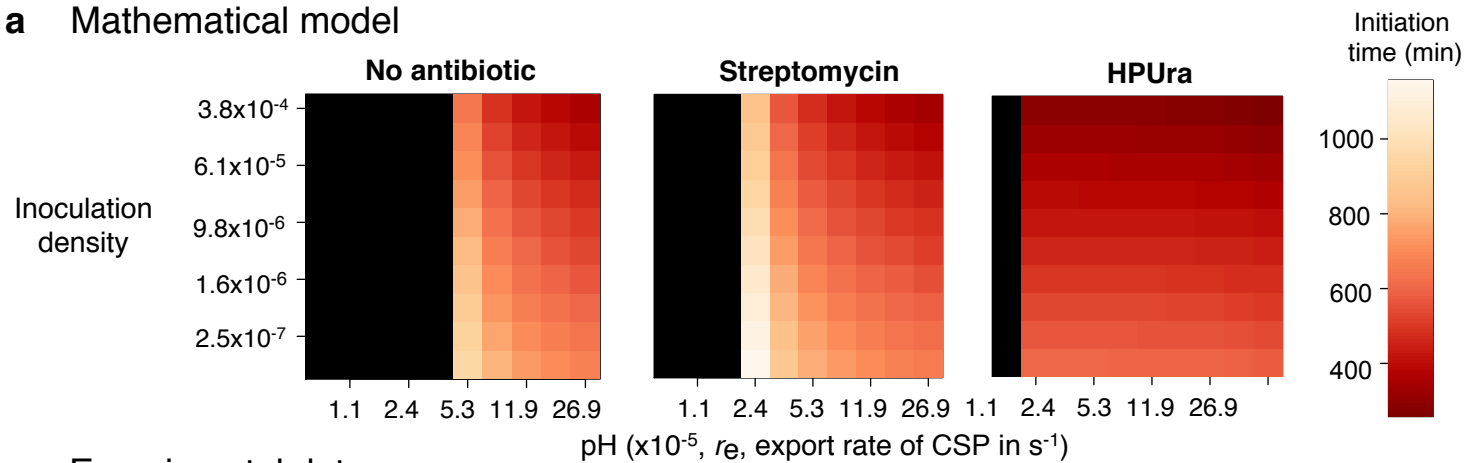

## b Experimental data

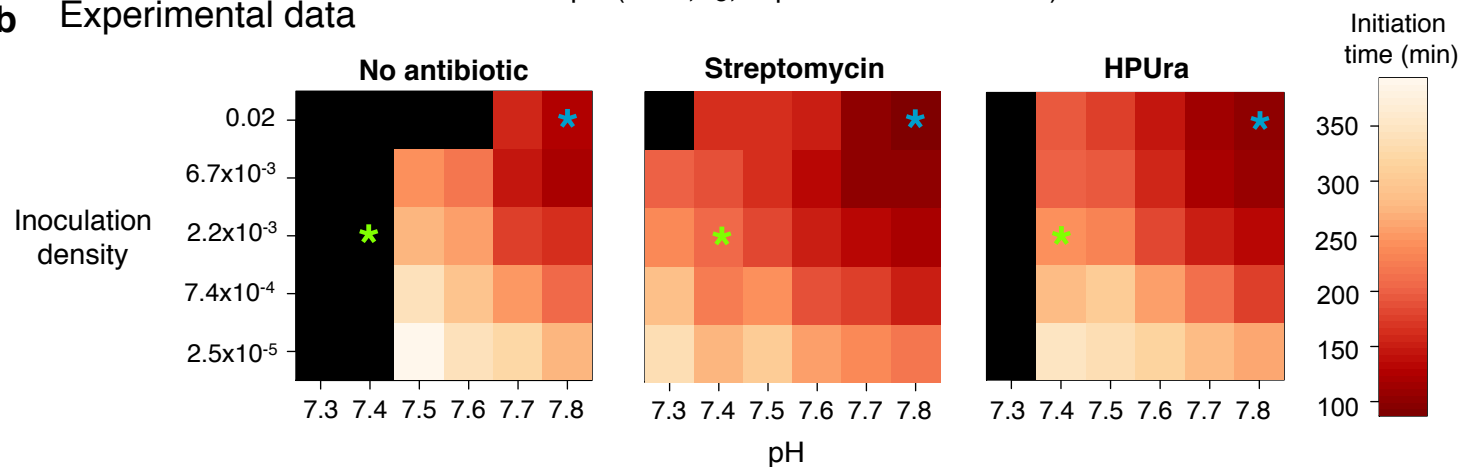

## c Antibiotics induce competence at pH 7.4 (★)

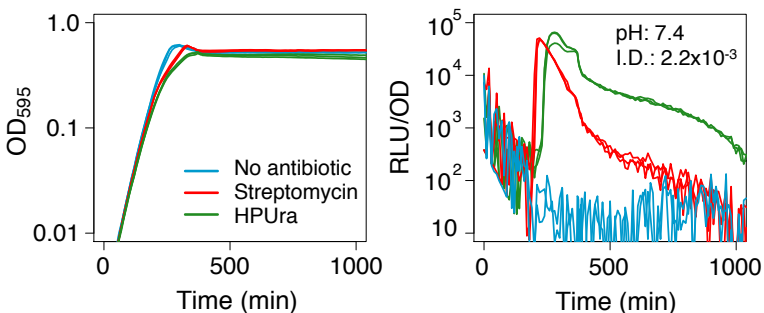

## d Antibiotics speed up competence development (★)

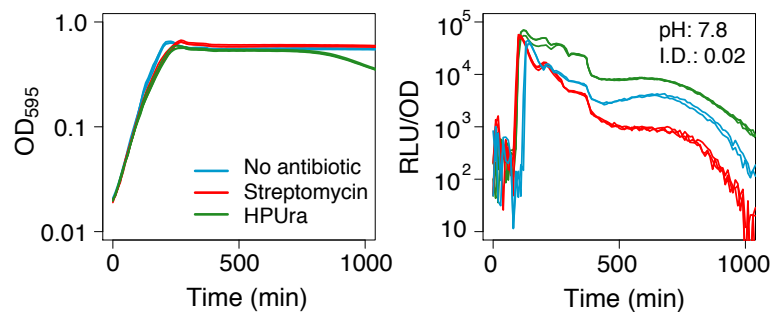

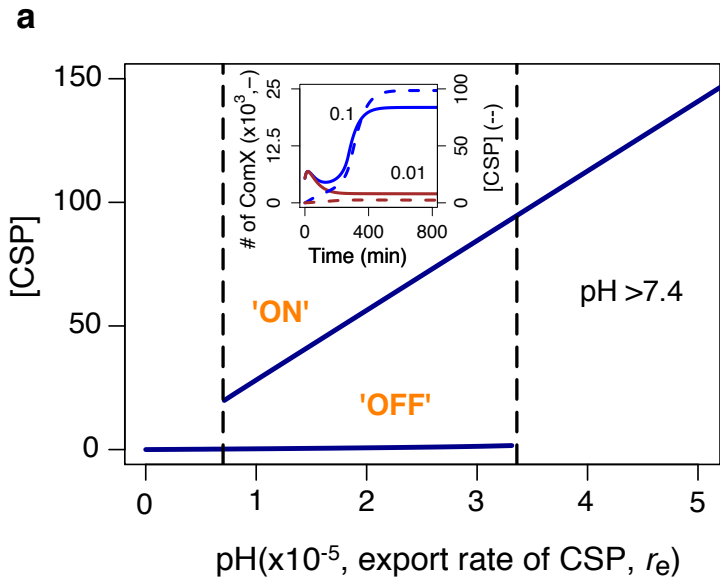

**b** Initial CSP concentration

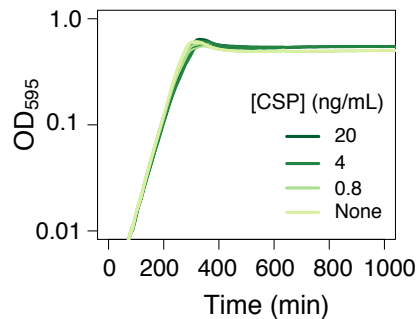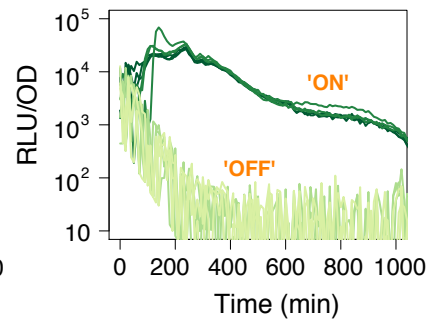

**c** Cell history

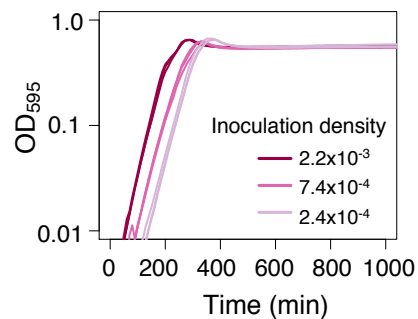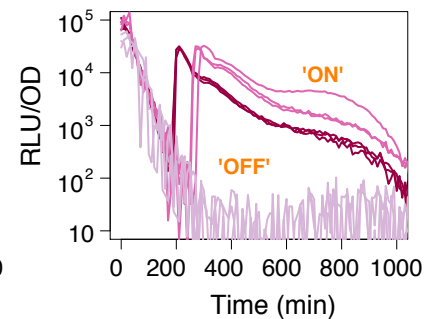

Source: http://biorxiv.org/content/10.1101/075762v2.full.pdf
